## RESEARCH ARTICLE

# *Msx1* deficiency interacts with hypoxia and induces a morphogenetic regulation during mouse lip development

Mitsushiro Nakatomi<sup>1,2,\*</sup>, Kerstin U. Ludwig<sup>3</sup>, Michael Knapp<sup>4</sup>, Ralf Kist<sup>1,5</sup>, Steven Lisgo<sup>1</sup>, Hayato Ohshima<sup>6</sup>, Elisabeth Mangold<sup>3</sup> and Heiko Peters<sup>1,\*</sup>

## ABSTRACT

Nonsyndromic clefts of the lip and palate are common birth defects resulting from gene-gene and gene-environment interactions. Mutations in human *MSX1* have been linked to orofacial clefting and we show here that *Msx1* deficiency causes a growth defect of the medial nasal process (Mnp) in mouse embryos. Although this defect alone does not disrupt lip formation, *Msx1*-deficient embryos develop a cleft lip when the mother is transiently exposed to reduced oxygen levels or to phenytoin, a drug known to cause embryonic hypoxia. In the absence of interacting environmental factors, the Mnp growth defect caused by *Msx1* deficiency is modified by a *Pax9*-dependent 'morphogenetic regulation', which modulates Mnp shape, rescues lip formation and involves a localized abrogation of *Bmp4*-mediated repression of *Pax9*. Analyses of GWAS data revealed a genome-wide significant association of a Gene Ontology morphogenesis term (including assigned roles for *MSX1*, *MSX2*, *PAX9*, *BMP4* and *GREM1*) specifically for nonsyndromic cleft lip with cleft palate. Our data indicate that *MSX1* mutations could increase the risk for cleft lip formation by interacting with an impaired morphogenetic regulation that adjusts Mnp shape, or through interactions that inhibit Mnp growth.

**KEY WORDS:** Cleft lip and palate, Hypoxia, Morphogenetic regulation, *Msx1*, *Pax9*

## INTRODUCTION

Clefts of the lip and palatal structures are common developmental defects in humans and are part of the phenotypic spectrum in various Mendelian syndromes (Tolarová and Cervenka, 1998). However, most cleft lips and/or cleft palates (summarized as orofacial clefting) are nonsyndromic malformations and have a multifactorial aetiology, including strong contributions by interacting genetic components and environmental factors (Mossey et al., 2009). The incidence of orofacial clefting varies among different ethnic groups, gender and socioeconomic status

and occurs in 1 out of 700 births on average (Dixon et al., 2011). Based on the results of genetic and embryological studies, nonsyndromic orofacial clefts are traditionally classified as isolated, nonsyndromic cleft palate (equivalent to nonsyndromic cleft palate only, nsCPO) and nonsyndromic cleft lip that occurs with (nsCLP) or without (nsCLO) a cleft palate, the latter two collectively referred to as nsCL/P. The multifactorial aetiology and concealed Mendelian inheritance patterns underlying nsCPO and nsCL/P complicate the identification of genetic loci (Dixon et al., 2011; Setó-Salvia and Stanier, 2014); however, recent genome-wide association studies (GWAS) and meta-analyses identified at least 40 genetic risk loci for these defects (Birnbbaum et al., 2009; Grant et al., 2009; Mangold et al., 2010; Beaty et al., 2010; Ludwig et al., 2012, 2016, 2017; Sun et al., 2015; Leslie et al., 2016; Yu et al., 2017; Butali et al., 2019). The studies provide an essential framework for disentangling the complex processes regulating lip and palate development (Mangold et al., 2011). However, the identity of the vast majority of causal variants and critical gene-gene (GG) and gene-environment (GE) interactions underlying the multifactorial aetiology of orofacial clefting remain to be determined.

The formation of the lip requires continuous fusion and merging of craniofacial processes (or prominences); that is, the medial nasal process (Mnp) and the maxillary process (Mxp), which both initially develop independently of each other (Gritli-Linde, 2012). A cleft of the lip occurs when this process is impaired, and a cleft may extend further involving the nose when merging is also disrupted between the Mnp and the lateral nasal process (Lnp). A crucially important step in lip formation is the timely regulated disintegration of the epithelium at the sites of fusion, a prerequisite for intermingling of neural crest cell-derived mesenchymal cells to establish stable junctions. Epithelial disintegration involves programmed cell death and occurs at the so-called lambdoidal junction, the region at which the tips of Mnp, Mxp and Lnp make contact and fuse with each other. Crucially important developmental pathways that regulate this tightly controlled process have been identified, showing that a *Pbx1/2*-controlled Wnt signalling pathway regulates p63/Irf6-mediated cell death in the epithelial seam at the lambdoidal junction (Ferretti et al., 2011; Kousa and Schutte, 2016). Interestingly, expanded Shh signalling negatively affects the Wnt signalling and p63/Irf6 pathways at the lambdoidal junction and results in cleft lip formation (Kurosaka et al., 2014). Expanded Shh signalling causes ectopic canonical Wnt inhibitor activity, which may involve displaced *Vax1* expression (Kurosaka et al., 2014). Although the functional roles of *Vax1* in lip and palate development remain to be investigated (Geoghegan et al., 2017), several reports of variants in the human *VAX1* gene highlight its involvement in human CL/P (Slavotinek et al., 2012; Butali et al., 2019).

The *MSX1* gene encodes a homeodomain-containing transcription factor, and *MSX1* haploinsufficiency in humans causes familial oligodontia (Vastardis et al., 1996). CL/P is

<sup>1</sup>Biosciences Institute, Newcastle University, International Centre for Life, Newcastle upon Tyne NE1 3BZ, UK. <sup>2</sup>Division of Anatomy, Department of Health Promotion, Kyushu Dental University, Kitakyushu 803-8580, Japan. <sup>3</sup>Institute of Human Genetics, University Hospital Bonn, 53127 Bonn, Germany. <sup>4</sup>Institute of Medical Biometry, Informatics and Epidemiology, University of Bonn, 53127 Bonn, Germany. <sup>5</sup>School of Dental Sciences, Faculty of Medical Sciences, Newcastle University, Newcastle upon Tyne NE2 4BW, UK. <sup>6</sup>Division of Anatomy and Cell Biology of the Hard Tissue, Department of Tissue Regeneration and Reconstruction, Niigata University Graduate School of Medical and Dental Sciences, Niigata 951-8514, Japan.

\*Authors for correspondence (nktm-emb@umin.ac.jp; heiko.peters50@gmail.com)

 H.P., 0000-0002-2226-0749

occasionally seen in affected patients (van den Boogaard et al., 2000) and a contribution of *MSX1* mutations to nsCL/P and nsCPO was first identified by a candidate-gene linkage-disequilibrium strategy (Lidral et al., 1998). A number of studies have subsequently supported a role for *MSX1* in nonsyndromic orofacial clefting in a broad ethnic range (Fallin et al., 2003; Schultz et al., 2004; Suzuki et al., 2004; Vieira et al., 2005; Tongkobpetch et al., 2006; Otero et al., 2007; Jagomägi et al., 2010; Gowans et al., 2016). One study suggested that about 2% of nsCL/P cases might involve mutations of the *MSX1* gene in some populations (Jezewski et al., 2003). A genome-wide significant association between genetic variants at the *MSX1* locus and the sub-phenotype nsCLP has recently been identified in the Chinese population (Yu et al., 2017). Interactions between DNA variants in *MSX1* with maternal smoking and with alcohol consumption have been suggested to increase the risk for orofacial clefting (Romitti et al., 1999; Beaty et al., 2002; Fallin et al., 2003; van den Boogaard et al., 2008), although this association was not found in a cohort of Danish origin (Mitchell et al., 2001). Likewise, it has been demonstrated that a link between maternal smoking and *MSX1* variants increased the risk for developmental limb malformations (Hwang et al., 1998), but this could not be confirmed by another study (Carmichael et al., 2004).

Inactivation of *Msx1* in mice results in the complete absence of teeth and cleft secondary palate (Satokata and Maas, 1994). *Msx1* and its close homologue *Msx2* are co-expressed in various craniofacial regions derived from neural crest cells, a multipotent migratory cell population that originates from the dorsal neural fold and generates a major source of the skeletal and connective tissue of the developing face (Trainor, 2005; Chai and Maxson, 2006; Suzuki et al., 2016). Although a cleft lip does not form in the absence of *Msx1*, the *Msx1*<sup>-/-</sup>;*Msx2*<sup>-/-</sup> double homozygous mouse mutants exhibit severe craniofacial defects, including exencephaly and a particularly dysmorphic midface (Satokata et al., 2000; Ishii et al., 2005). In addition, defects in cardiac outflow tract formation and a severe limb phenotype in *Msx1*<sup>-/-</sup>;*Msx2*<sup>-/-</sup> mutants are not seen in either single mutant, showing that the functions of *Msx1* and *Msx2* can compensate for each other at various sites during development (Ishii et al., 2005; Lallemand et al., 2005). Cleft lip formation also occurs in *Msx1*<sup>-/-</sup>;*Pax9*<sup>-/-</sup> double homozygous mouse mutants (Nakatomi et al., 2010); however, this genetic interaction has not been investigated and the impact of combined *Msx1* and *Pax9* deficiency on lip development is currently unknown.

Multiple lines of evidence have shown that episodes of embryonic hypoxia during the first trimester of human pregnancy are associated with developmental defects and craniofacial malformations, including cleft lip and palate (reviewed by Webster and Abela, 2007). More recently, an increasing number of medically relevant substances have been shown to cause embryonic hypoxia through a significant disruption of the embryonic heart beat rate (Danielsson et al., 2003, 2005a,b, 2007). Although these adverse effects are linked to cleft lip and palate formation, their interactions with genetic predispositions in orofacial clefting are largely unknown.

## RESULTS

### ***Msx1* deficiency interacts with reduced maternal respiratory oxygen levels and with phenytoin during lip development**

Embryonic hypoxia has been implicated as an environmental risk factor for orofacial clefting (Millicovsky and Johnston, 1981a; Bronsky et al., 1986; Nagaoka et al., 2012; Smith et al., 2013). Among other causes, embryonic hypoxia might be a consequence of constriction of uterine blood vessels or of bradycardia/arrhythmia of

the embryonic heart, conditions that have been widely described as side effects of several commonly prescribed drugs (Webster and Abela, 2007). To investigate a possible interaction between *Msx1* deficiency and hypoxia, we mated heterozygous *Msx1* mutant mice and exposed pregnant females to 10% O<sub>2</sub> during the period of early lip formation [i.e. from embryonic day (E) 10.5 to E12.5]. Gross inspection of embryos at E15.5 revealed that 72% (13/18) of *Msx1* homozygous mutant embryos (*Msx1*<sup>-/-</sup>) developed a bilateral or unilateral cleft lip, whereas none of the *Msx1*<sup>+/-</sup> embryos (0/39;  $P=1.54^{-09}$ ) or *Msx1*<sup>+/+</sup> embryos (0/8;  $P=6.75^{-04}$ ) showed this defect (Fig. 1A,B).

Embryonic hypoxia in the mesenchyme of the branchial arches has been identified as a side effect of phenytoin, an anticonvulsant drug with known teratogenic effects in both humans and mice, in particular for cleft lip and cleft palate formation (Azarbayjani and Danielsson, 2001; Danielsson et al., 2005a; Webster et al., 2006). Thus, to model pharmacologically induced hypoxic stress during lip development, we exposed pregnant *Msx1*<sup>+/-</sup> females to different concentrations of phenytoin from E10.5 to E11.5. Notably, the exposure strongly increased the incidence of cleft lip formation in *Msx1*<sup>-/-</sup> embryos in a dose-dependent manner and reached 91.7% at the highest dosage (Fig. 1C), at which all affected mutants exhibited a bilateral cleft lip. The defects involved severe growth retardation of the developing Mnp and Mxp at E11.5 (Fig. 1D). Moreover, affected *Msx1*<sup>-/-</sup> embryos exposed to phenytoin at the mid-range concentration exhibited a spectrum of upper lip deformities typically seen in human patients, including hypoplastic lip, unilateral cleft lip and bilateral cleft lip (Fig. 1E-H; Table S1). At the highest dosage, the frequency of cleft lip was also increased in heterozygous *Msx1* mutants (9.2%;  $P<0.027$ ; Table S1), a condition reminiscent of cleft lip formation in human patients with heterozygous mutations in *MSX1*. Consistent with redundant roles of *Msx1* and *Msx2* in craniofacial development (Ishii et al., 2005), the sensitivity to phenytoin-induced cleft lip was significantly increased in *Msx1*/*Msx2* compound mutants (Table S1).

To confirm the hypoxia-inducing effects of phenytoin in the developing lip, we carried out immunohistochemical staining of pimonidazol (Hypoxyprobe-1), which forms covalent adducts in hypoxic tissues, including mouse embryonic tissues (Arteel et al., 1995; Danielsson et al., 2003). The staining revealed a strongly increased intensity of hypoxia in the Mnp at E11.0 in both phenytoin-treated wild-type and *Msx1*-deficient embryos, whereas weak staining was observed in untreated samples (Fig. S1). In contrast, upregulated expression of Hif1, a key factor mediating vital cellular responses to embryonic hypoxia (Dunwoodie, 2009), and of the Hif1 target *Vegf*, was less markedly upregulated in *Msx1*<sup>-/-</sup> embryos (Fig. S1). To test whether it is possible to offset the adverse effects of phenytoin during lip formation (Millicovsky and Johnston, 1981a,b), we kept pregnant females in a hyperoxic environment (50% O<sub>2</sub>) for the duration of phenytoin treatment (48 h). In this experimental group, only 7 out of 22 (31.8%) of the lip fusion sites were affected in *Msx1*<sup>-/-</sup> mutant embryos, whereas 8 out of 14 (57.1%) fusion sites showed a cleft at normoxia. Although the calculated *P*-value ( $P=0.13$ ) did not reach statistical significance, the data suggests that simultaneous exposure to elevated oxygen levels can mitigate the adverse effects of phenytoin on lip development in the absence of *Msx1*.

In the outbred genetic background (CD1) of the mice used in this work, the interaction caused a phenotypic spectrum ranging from clefts of the soft palate only to complete cleft secondary palate (Fig. 1I-K). The interaction affected the morphogenesis of the palatal shelves (Fig. 1L) and the incidence was highly reproducible

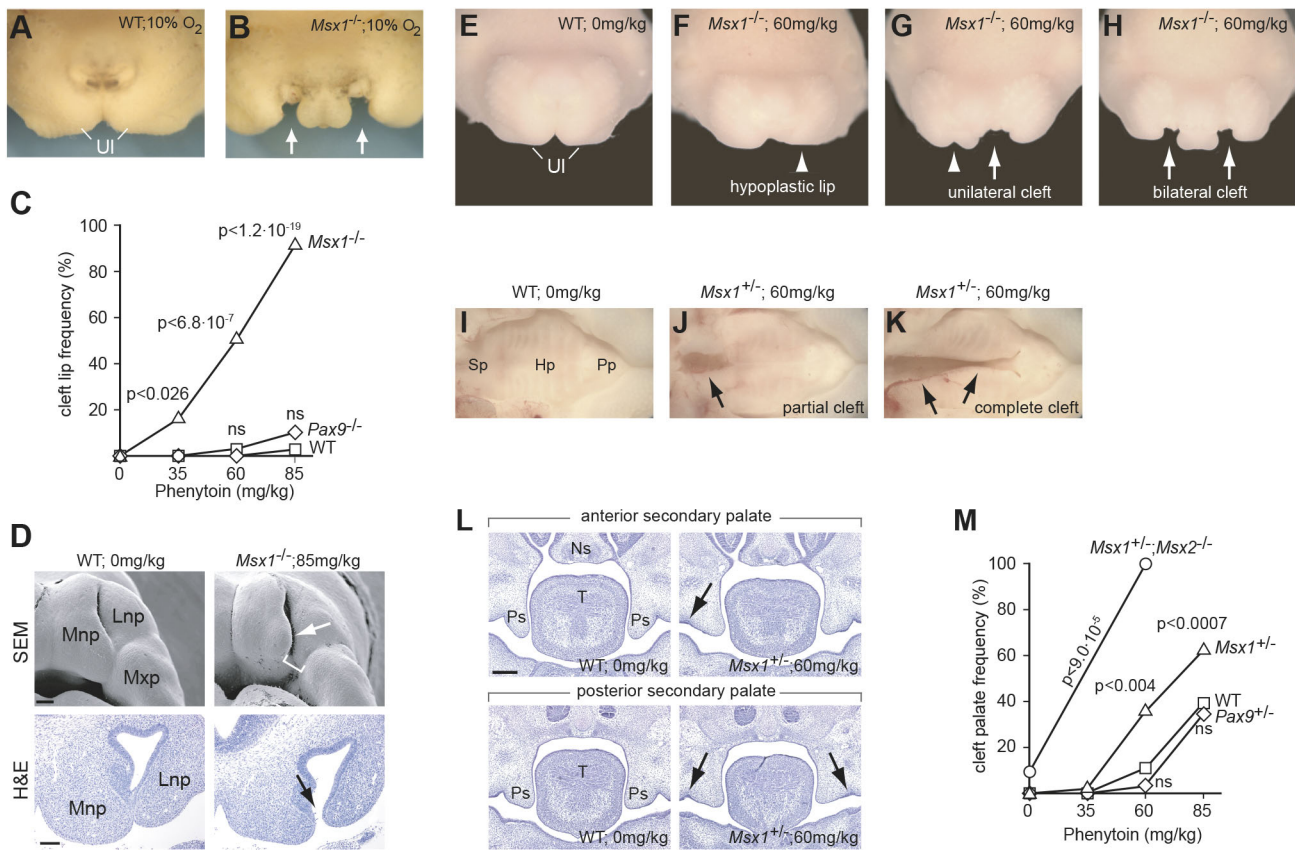

**Fig. 1. *Msx1* interacts with low oxygen level and phenytoin in orofacial clefting.** (A,B) Upper lip development is not affected in E15.5 wild-type (WT) embryos after transient exposure of the pregnant female to 10% O<sub>2</sub> (A), whereas *Msx1*<sup>-/-</sup> embryos frequently develop a bilateral cleft lip (B). (C) Injection of phenytoin causes unilateral or bilateral cleft lip formation in *Msx1*<sup>-/-</sup> embryos in a dose-dependent manner. Deficiency of *Pax9* does not result in a significant increase in frequency of cleft lip. (D) SEM images and sections stained with haematoxylin and eosin (H&E) at E11.5. *Msx1*-deficient embryos exhibit a wide gap between Mnp and Mxp (bracket) and a cleft between Mnp and Lnp (arrows) following injection of phenytoin. (E-H) Phenytoin injections cause a range of upper lip malformations in *Msx1*<sup>-/-</sup> embryos. (I-K) Oral view of secondary palate at E15.5. Phenytoin-treated *Msx1*<sup>+/-</sup> embryos may develop a partial (J) or complete (K) cleft. (L) Frontal sections of phenytoin-treated *Msx1*<sup>+/-</sup> embryos (E13.5) occasionally lack indentations of the palatal shelves (arrows). (M) *Msx2*-deficiency increases the frequency of cleft palate when combined with *Msx1* heterozygosity, whereas *Pax9* heterozygosity does not interact with phenytoin in cleft palate formation. Hp, hard palate; Lnp, lateral nasal process; Mnp, medial nasal process; Mxp, maxillary process; Ns, Nasal septum; ns, not significant; Pp, primary palate; Ps, palatal shelves; Sp, soft palate; T, tongue; UL, upper lip. Scale bars: 100 μm (D), 200 μm (L).

in heterozygous *Msx1* mutant embryos at higher dosages ( $P < 0.004$  at 60 mg/kg and  $P < 0.0007$  at 85 mg/kg) and reached 100% when *Msx1* heterozygosity was combined with the absence of *Msx2* (Fig. 1M, Table S1). Importantly, *Msx1* heterozygosity of the pregnant mother did not influence the frequency of cleft palate (Fig. S2), indicating that the genotype of the embryo is the key genetic determinant for the observed GE interactions. A GE interaction between phenytoin and *Msx1* heterozygosity that caused a cleft secondary palate was recently also observed in an inbred (C57BL/6) genetic background (M.N., unpublished).

### ***Msx1* and *Pax9* regulate different aspects of Mnp development**

*Msx1* and *Pax9* are co-expressed in neural crest cell-derived dental mesenchyme (Mackenzie et al., 1991; Neubüser et al., 1995) and both genes are essential for tooth formation (Satokata and Maas, 1994; Chen et al., 1996; Peters et al., 1998). Moreover, *Msx1* and *Pax9* cooperatively regulate downstream target genes in the tooth mesenchyme, and preliminary observations showed that about 40% of *Msx1*;*Pax9* double homozygous mouse mutants exhibited a cleft lip (Ogawa et al., 2006; Nakatomi et al., 2010). Based on these observations we speculated that the anticonvulsant drug

phenytoin might interact with *Pax9* deficiency in cleft lip formation in a similar manner to that revealed for *Msx1*. Surprisingly, however, the incidence of cleft lip in *Pax9* homozygous mutant embryos was not significantly increased at any dosage tested and there was no significant increase in phenytoin-induced cleft palate in heterozygous *Pax9* mutant embryos (Fig. 1C; Table S1).

The strong interaction of phenytoin with *Msx1*, but not with *Pax9*, suggests that *Msx1* and *Pax9* could regulate different aspects during lip formation. To understand this, we first compared their expression patterns in the developing Mnp, Lnp and Mxp. Whole-mount *in situ* hybridization on mouse embryonic heads at E10.5 revealed that *Msx1* and *Msx2* were expressed in all three processes, whereas expression of *Pax9* was restricted to the Mnp and Lnp (Fig. 2A,C,E). *In situ* hybridization on sections showed that the expression domains of *Msx1* and *Msx2* were restricted to the anterior-distal compartment of the Mnp, whereas *Pax9* was expressed in the posterior-proximal region of the Mnp (Fig. 2B,D,F). *In situ* hybridization of *MSX1* and immunohistochemical analyses of *PAX9* expression in human embryonic tissue revealed that both genes were expressed during human Mnp formation in patterns similar to those observed during mouse Mnp development (Fig. 2G-M). In addition, we found that



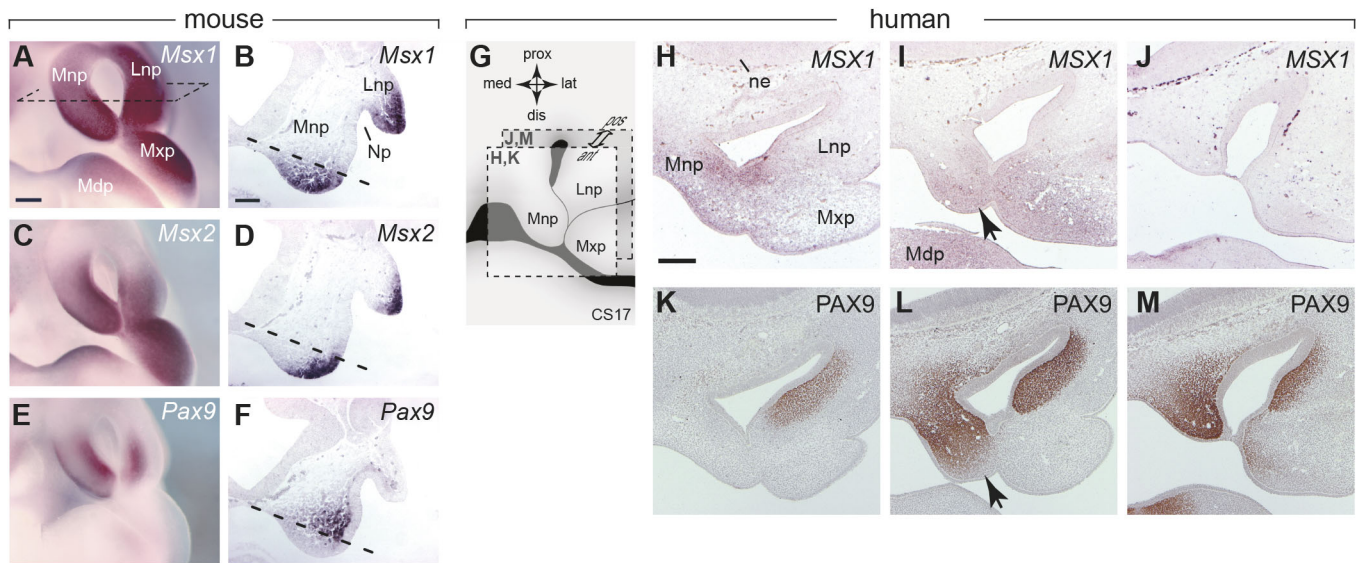

**Fig. 2. Conserved complementary expression patterns of *Msx1* and *Pax9* in the Mnp and Lnp in mice and humans.** (A-F) *In situ* hybridization of whole-mount embryos (A,C,E) and on coronal sections (B,D,F; plane of section indicated by rectangle in A). Although *Msx1* and *Msx2* are primarily expressed in the epithelium and mesenchyme of the anterior region of the Mnp (A-D), *Pax9* transcripts are mainly detectable in the posterior Mnp mesenchyme (E,F). (G) Diagram of the developing human nose and lip at Carnegie stage 17 (CS17). Squares indicate levels of sections used for expression analysis. (H-M) *MSX1* transcripts detected by *in situ* hybridization dominate in the anterior regions of the Mnp and Mxp (H-J), whereas immunohistochemical staining shows that PAX9 expression is mainly found in the posterior part of the Mnp (L,M) and in the mesenchyme adjacent to the nasal epithelium of the Lnp (K-M). Lnp, lateral nasal process; Mdp, mandibular process; Mnp, medial nasal process; Mxp, maxillary process; ne, neural epithelium. Scale bars: 200  $\mu$ m (A,H), 100  $\mu$ m (B).

*Msx2* and *Pax1*, the paralogous genes of *Msx1* and *Pax9*, respectively, were not upregulated in *Msx1* and *Pax9* single homozygous mutants (Fig. S3).

Next, we compared Mnp morphology of *Msx1* and *Pax9* single homozygous mutants at E11.5. At this developmental stage, the distal part of the Mnp is normally oriented towards the Lnp and Mxp (Fig. 3A), a transient and characteristic feature during mammalian upper lip formation that is also seen in primates, including humans (Senders et al., 2003). In *Msx1*<sup>-/-</sup> embryos, we consistently observed growth retardation of the distal compartment of the Mnp, but the contact between Mnp and Mxp was always well established in these mutants (Fig. 3A). Importantly, this condition was associated with a considerably pronounced curvature of the Mnp (Fig. 3A,B). In contrast, the Mnp curvature was attenuated in *Pax9*<sup>-/-</sup> mutants and we did not observe significant growth retardation of the distal Mnp region in the absence of *Pax9* alone (Fig. 3A,B).

#### ***Pax9*-dependent alteration of Mnp morphogenesis rescues lip formation and involves upregulated *Pax9* expression in the *Msx1*-deficient Mnp**

It was noticeable that growth retardation of the Mnp caused by *Msx1*-deficiency was consistently associated with a significant increase in Mnp curvature. Interestingly, although the distal compartment of the Mnp was also smaller in *Msx1*<sup>-/-</sup>;*Pax9*<sup>-/-</sup> mutants, the Mnp curvature was significantly flattened, resulting in an irregularly long nasal pit (Fig. 3A,B). Moreover, the area of contact between Mnp and Mxp was noticeably smaller in the double homozygous mutants (Fig. 3C), resulting in a wide gap between left and right Mxp in embryos affected by cleft lip (Fig. 3D). These findings indicate that insufficient contact between Mnp and Mxp in *Msx1*<sup>-/-</sup>;*Pax9*<sup>-/-</sup> mutants resulting in a cleft lip is a consequence of combining two Mnp defects that occur independently of each other: growth retardation caused

by *Msx1* deficiency and reduced curvature caused by the absence of *Pax9*.

Because *Pax9* deficiency leads to a decrease in Mnp curvature, we hypothesized that the establishment of a *Pax9*-dependent and pronounced Mnp curvature in *Msx1*<sup>-/-</sup> mutant embryos could involve upregulation of *Pax9* expression. In normal Mnp development, *Pax9* was initially expressed distally but gradually became restricted to more proximal regions between E10.5 and E11.5 (Fig. 4A-C; Fig. S4). Interestingly, *Pax9* expression was upregulated and distally expanded in the Mnp of *Msx1*<sup>-/-</sup> and *Msx1*/*Msx2* compound mutant embryos between E10.5 and E11.5 (Fig. 4D-F,L; Fig. S5). In contrast, *Msx1* expression levels were not altered in the Mnp of *Pax9*<sup>-/-</sup> mutants (Fig. 4G,H). Together, these results show that the gradual restriction of *Pax9* expression to a proximal domain in the Mnp is *Msx1*-dependent, revealing that *Msx1* acts genetically upstream of *Pax9* in the developing Mnp.

#### ***Msx1*/*Msx2*-regulated *Bmp4* expression is involved in restricting *Pax9* expression in the Mnp mesenchyme**

The complementary expression patterns of *Msx1* and *Pax9* in the wild-type Mnp (Fig. 2) indicate that *Msx1*-dependent restriction of *Pax9* expression is regulated by a non-cell autonomous mechanism. A potential candidate for mediating this process is *Bmp4*, a secreted growth factor that functions in a positive feedback loop with *Msx1* and *Msx2* at various sites during craniofacial development (Zhang et al., 2002) and has been shown to suppress mesenchymal *Pax9* expression in early tooth and palate development (Neubüser et al., 1997; Liu et al., 2005). In the developing Mnp, *Bmp4* expression shifts from the epithelium to the mesenchyme (Gong and Guo, 2003), where it overlaps with that of *Msx1* and *Msx2* and in which the expression pattern is complementary to that of *Pax9* at E11.0 (Fig. 4I,J). Consistent with redundant roles of *Msx1* and *Msx2* in activation of mesenchymal *Bmp4* transcription, expression of *Bmp4* in the Mnp mesenchyme was strongly reduced in *Msx1*/*Msx2*

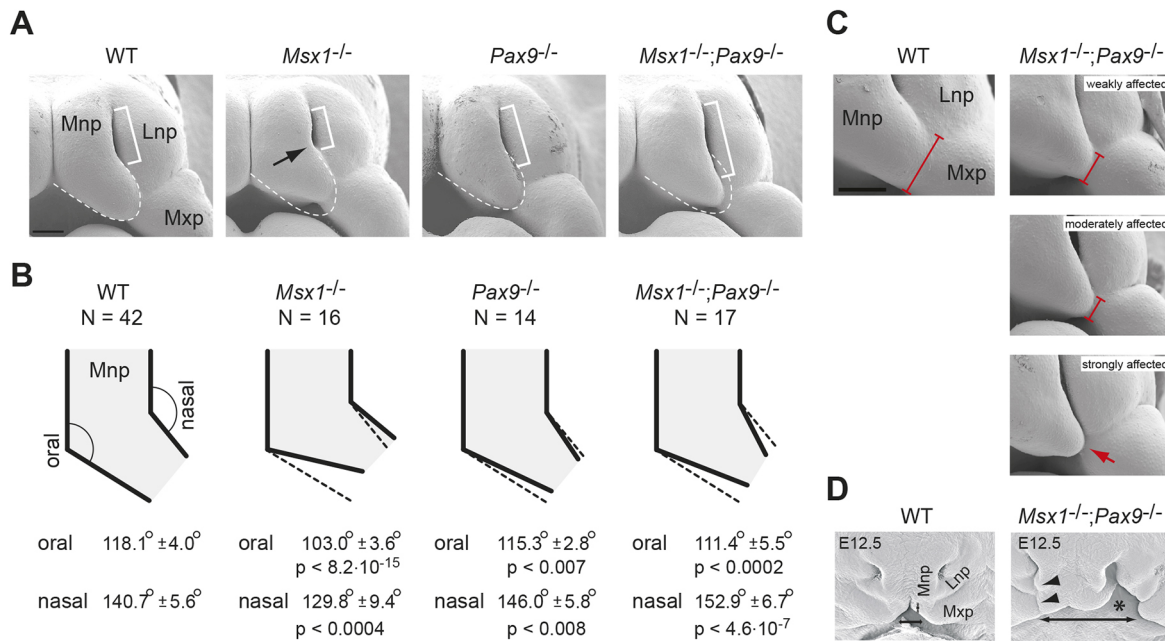

**Fig. 3. *Pax9*-dependent alteration of Mnp morphogenesis prevents cleft lip in *Msx1*<sup>-/-</sup> mutants.** (A) SEM images of the embryonic nose and lip at E11.5. Dashed line delineating the normal shape of the Mnp is superimposed on images. A sharp bend of the Mnp is formed in *Msx1*<sup>-/-</sup> mutants (arrow) and is associated with a shorter nasal pit (brackets). In contrast, the curvature is attenuated and nasal pits are longer in *Pax9*<sup>-/-</sup> and *Msx1*<sup>-/-</sup>;*Pax9*<sup>-/-</sup> mutants, respectively. (B) Schematic Mnp shapes and angles of oral and nasal aspects. Dashed lines indicate wild-type Mnp angles. Note that the angle on the nasal aspect is smaller in *Msx1*<sup>-/-</sup> mutants, and bigger in *Pax9*<sup>-/-</sup> mutants and *Msx1*<sup>-/-</sup>;*Pax9*<sup>-/-</sup> mutants. *P*-values refer to comparison with wild-type samples. (C) SEM images showing different severities of affected Mnp-Mxp contact in *Msx1*<sup>-/-</sup>;*Pax9*<sup>-/-</sup> mutants. The zone of contact is consistently reduced (brackets) and absent in some cases (arrow). (D) SEM images at E12.5. *Msx1*<sup>-/-</sup>;*Pax9*<sup>-/-</sup> mutants exhibit a wider distance between Mxps (double-headed arrow). Unilateral cleft lip (asterisk) and incomplete Mnp-Lnp and Mnp-Mxp fusion (arrowheads) are consistently seen in these mutants. Lnp, lateral nasal process; Mnp, medial nasal process; Mxp, maxillary process; WT, wild type.

compound mutants (Fig. 4K), whereas that of *Pax9* was correspondingly expanded (Fig. 4L). In the absence of *Msx1* alone, *Bmp4* expression was mostly affected in a medial domain within the posterior Mnp region (Fig. 4N) and expression of *Pax9* was expanded particularly into this domain (Fig. 4P). Importantly, *Msx2* expression was barely detectable in the medial domain within the posterior Mnp in both wild-type and *Msx1*<sup>-/-</sup> mutants (Fig. 4Q,R), suggesting that the strong reduction in *Bmp4* expression results from a near-complete absence of *Msx1*/*Msx2*-regulated expression of *Bmp4* in this region. To verify a downstream effect of reduced *Bmp4* signalling, we analysed the distribution of phosphorylated Smad proteins (pSmad1/5/8; He et al., 2010). Quantification of pSmad1/5/8-positive nuclei revealed significantly reduced expression in the Mnp of *Msx1*<sup>-/-</sup> embryos, with 76.95% of the nuclei stained in controls and 36.73% stained in *Msx1*<sup>-/-</sup> embryos (*P*=0.0007; Fig. 4S-V; Fig. S6, Table S2). These results indicate that the *Bmp4* downstream pathway is significantly affected in the medial area of the Mnp and supports the view that *Msx2* does not fully compensate for the absence of *Msx1* in this region.

To directly demonstrate an inhibitory effect of *Bmp4* on *Pax9* expression, we implanted *Bmp4* protein-soaked beads into the mesenchyme of cultured nasal processes dissected at E10.5. Following organ culture, *in situ* hybridization revealed a strong downregulation of *Pax9* in both Mnp and Lnp (Fig. 5A). This finding demonstrates that *Bmp4* is sufficient for inhibiting *Pax9* expression in the Mnp mesenchyme and thus provides a plausible explanation for the expansion of *Pax9* expression seen in *Msx1*<sup>-/-</sup> and *Msx1*<sup>-/-</sup>;*Msx2*<sup>-/-</sup> mutant embryos.

In addition to the distal expansion of *Pax9* expression seen in the Mnp of *Msx1*<sup>-/-</sup> and *Msx1*<sup>-/-</sup>;*Msx2*<sup>-/-</sup> mutant embryos, we also observed an increase in *Pax9* promoter activity in the absence of a

functional *Pax9* gene (Fig. 5B). This was assessed by using a combination of the nonfunctional *Pax9* alleles *Pax9*<sup>lacZ</sup> (Peters et al., 1998) and *Pax9*<sup>del</sup> (Kist et al., 2007). The finding indicates the presence of a negative, auto-regulatory *Pax9* feedback loop that contributes to restricting *Pax9* expression to proximal regions of the Mnp. Although downregulated *Bmp4* expression probably accounts for the expanded *Pax9* expression in *Msx1*<sup>-/-</sup>;*Msx2*<sup>-/-</sup> mutant embryos, we did not detect altered *Bmp4* expression in the *Pax9*-deficient Mnp at E10.5 and E11.5 (Fig. 5C). In addition, the expression of *Shh* and its receptor *Ptch1* was not changed (M.N., unpublished). However, using a candidate gene approach we found that *gremlin1* (*Grem1*), a secreted *Bmp4* antagonist (Hsu et al., 1998), was ectopically expressed in the Mnp of *Pax9*<sup>-/-</sup> mutants (Fig. 5D). This suggests a mechanism by which upregulated *Grem1* expression neutralizes *Bmp4*-mediated inhibition of *Pax9* expression in the MNP mesenchyme of *Pax9*<sup>-/-</sup> mutants.

Collectively, the data suggest a model that integrates *Msx1* and *Pax9* functions into two parallel acting pathways that are connected through a relay mechanism involving *Bmp4* (Fig. 5E). Whereas *Msx1* is primarily required for Mnp growth, a loss of *Msx1* function also causes decreased *Bmp4* expression, which lowers *Bmp4*-mediated repression of *Pax9*. Our data suggest that the resulting increase in *Pax9* activity induces morphogenetic regulation and adjustment of Mnp shape that facilitates contact with the Mxp.

#### Genome-wide significant association of 'organ morphogenesis' (GO:0009887) for nsCLP includes *MSX1*, *MSX2*, *PAX9*, *BMP4* and *GREM1*

To investigate whether genetic data from GWAS in human nsCLP samples support our model of morphogenetic regulation derived from the experimental animal work (Fig. 5E), we turned to large-cohort



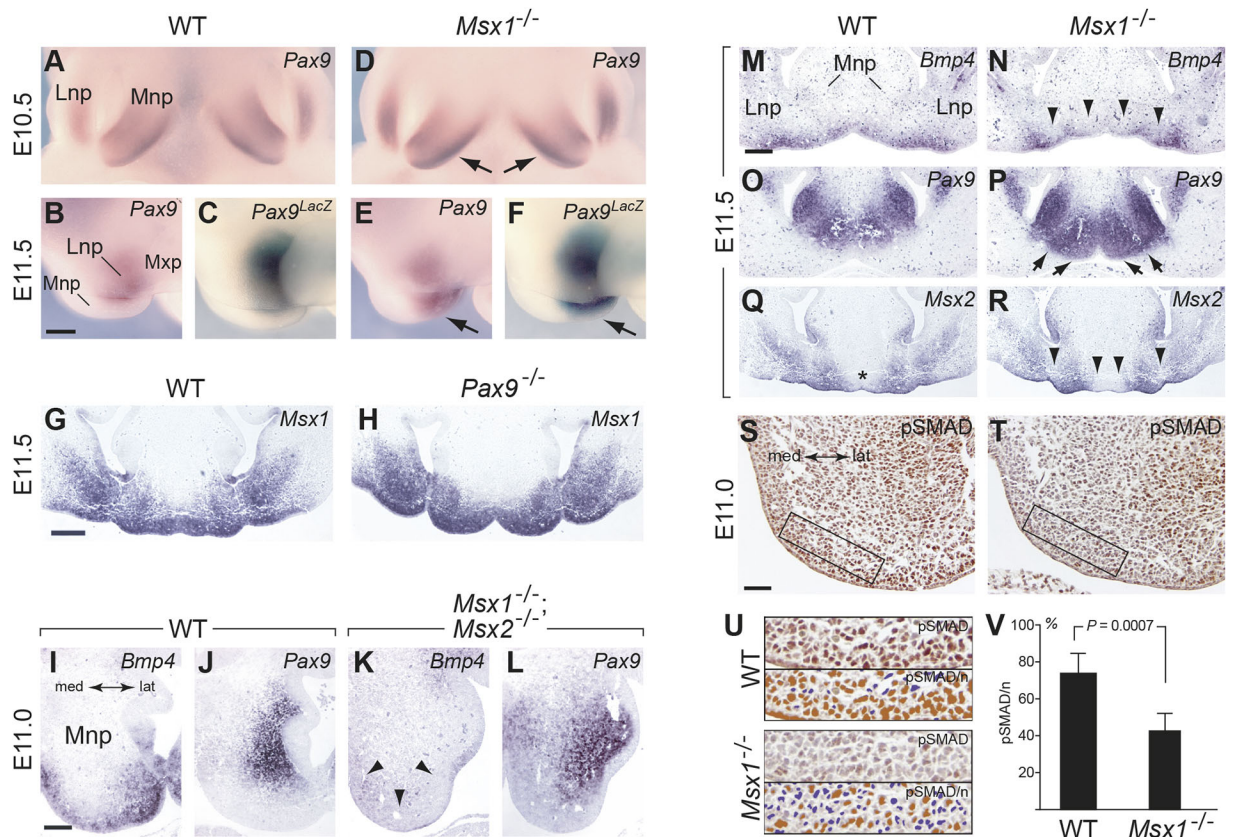

**Fig. 4. *Msx1* and *Msx2* modulate the complementary expression patterns of *Bmp4* and *Pax9*.** (A-F) Frontal (A,D) and lateral (B,C,E,F) views of whole-mount embryos hybridized to *Pax9* (A,B,D,E) or stained with X-gal (C,F). *Pax9* expression is upregulated in *Msx1*<sup>-/-</sup> embryos at E10.5 (arrows in D), and is expanded distally at E11.5 (arrows in E,F). (G,H) Coronal sections of the nasal region. The expression of *Msx1* is not affected in *Pax9*<sup>-/-</sup> embryos. (I-L) *In situ* hybridization of *Bmp4* and *Pax9* in the Mnp. Mesenchymal expression of *Bmp4* is normally restricted adjacent to the epithelium (I) and is barely detectable in *Msx1*<sup>-/-</sup>; *Msx2*<sup>-/-</sup> embryos (arrowheads in K). Conversely, *Pax9* expression is normally restricted to a proximal domain (J) and is expanded in the mutants (L). (M-R) *In situ* hybridization on coronal sections at E11.5. *Bmp4* expression pattern in the distal mesenchyme is interrupted in *Msx1*<sup>-/-</sup> embryos (arrowheads in N). *Pax9* expression is stronger and expanded in *Msx1*<sup>-/-</sup> embryos and is found in the direct vicinity of the ectodermal epithelium (arrows in P). (Q,R) Expression of *Msx2* partially overlaps with that of *Bmp4* in both wild-type and *Msx1*<sup>-/-</sup> embryos. Note that *Msx2* expression is missing centrally in wild-type embryos (asterisk in Q) and that *Msx2*-negative areas (arrowheads in R) match those at which *Bmp4* is also absent (compare with N). (S,T) pSmad staining in wild-type (S) and *Msx1*<sup>-/-</sup> (T) embryos. (U) Detection of pSmad-positive nuclei (brown) and pSmad-negative nuclei (blue) in boxed areas shown in S and T, as determined by ImmunoRatio (see Materials and Methods). (V) The ratio of pSmad-positive cells to all nuclei is significantly reduced in Mnp of *Msx1*<sup>-/-</sup> embryos compared with wild type. lat, lateral; Lnp, lateral nasal process; med, medial; Mnp, medial nasal process; Mxp, maxillary process. Scale bars: 250  $\mu$ m (B), 200  $\mu$ m (G,M), 100  $\mu$ m (I), 50  $\mu$ m (S).

data from human patients with nsCL/P and its subtypes nsCLP and nsCLO. We retrieved GWAS data from a previously published meta-analysis (Ludwig et al., 2017) and performed both single-gene and pathway analyses. First, we tested for association in aggregates of common variants in the genes investigated in this study, and each of the three traits as listed above. A set-based test as implemented in VEGAS (Liu et al., 2010) was applied to imputed data of both a European (Euro) and a multiethnic (All) meta-analysis. Consistent with previous results (Ludwig et al., 2016), *GREM1* reached genome-wide significance for nsCL/P and nsCLP (Table 1). We also observed a test-wide significant enrichment for *MSX1* in nsCL/P, and additional nominally significant results for all remaining genes and nsCL/P, except for *BMP4*. Although the significant associations of *MSX1* and *MSX2* were reflected by contributions from both nsCLP and nsCLO, the significance in nsCL/P for *PAX9* was primarily driven by nsCLP only (with non-significant results for nsCLO; Table 1).

Prompted by these results we investigated whether GWAS association signals are overrepresented in aggregate in Gene Ontology (GO) pathways that include *MSX1*, *PAX9*, *BMP4* and *GREM1*. Using the gene-based *P*-values generated above, we

carried out individual VEGAS pathway analyses for nsCL/P, nsCLP and nsCLO. In the analysis of nsCLP, a genome-wide significant result was identified for ‘organ morphogenesis’ (GO:0009887), with  $P=1 \times 10^{-06}$  after  $10^6$  permutations. Repeating the analysis with  $10^7$  permutations, revealed  $P=2 \times 10^{-07}$ . When performed for nsCLO, the pathway-based result for GO:0009887 was not significant ( $P>0.5$ ). The morphogenesis pathway GO:0009887 also includes *MSX2*, and a total of 557 genes directly matched results of the nsCLP-specific VEGAS pathway analysis (Table S3); however, 75 genes identified by the VEGAS pathway analysis did not produce a match in GO:0009887 (Table S4). Interestingly, a substantial proportion of these genes (185 out of 632; 29.3%) have previously been reported to play a role in human or mouse orofacial clefting, or for facial development (Tables S3,S4). Moreover, GO:0009887 was recently also identified through a database search approach for genes involved in jaw morphogenesis and disorders (Manocha et al., 2019).

We also investigated whether the morphogenesis pathway GO:0009887 plays a role in normal facial variation. Based on a list of 112 genes located at genetic loci previously identified through GWAS to be associated with diverse facial traits (Liu et al., 2012;

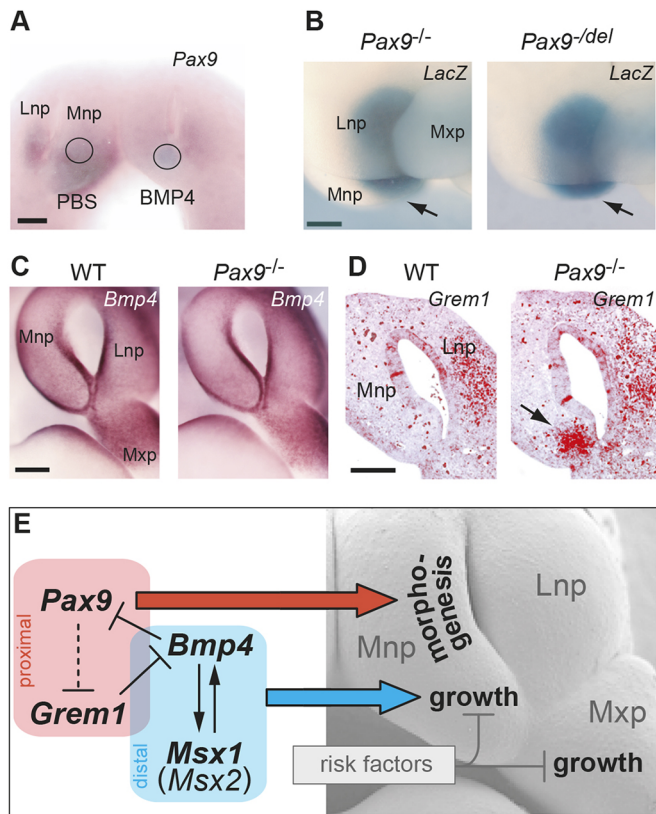

**Fig. 5. Mnp development involves a negative *Bmp4*-*Pax9*-*Grem1* feedback loop.** (A) *Pax9* whole-mount *in situ* hybridization of embryonic nose and lip after organ culture. Circles mark the positions of implanted BMP4 and control (PBS) beads. *Pax9* expression in both Mnp and Lnp is strongly downregulated by BMP4. (B) Expansion of *Pax9<sup>lacZ</sup>* expression is seen in both *Pax9<sup>-/-</sup>* (two *lacZ* alleles) and *Pax9<sup>-del</sup>* (one *lacZ* allele) mutant embryos. (C) *Bmp4* expression is not altered in the absence of *Pax9* at E10.5. (D) *Grem1* is ectopically expressed in the Mnp of *Pax9<sup>-/-</sup>* embryos (arrow). (E) Suggested model showing how *Bmp4* might connect a positive feedback loop (*Msx1*, *Msx2* and *Bmp4*) that regulates Mnp growth to a negative feedback loop (*Pax9*, *Grem1* and *Bmp4*) involved in regulating Mnp shape. Inactivation of *Msx1* results in a growth defect of the Mnp but also in an increase in *Pax9* expression, leading to a *Pax9*-dependent, compensatory morphogenetic change that prevents cleft lip formation in *Msx1<sup>-/-</sup>* embryos. A cleft lip may form when this compensatory pathway cannot be activated (*Msx1<sup>-/-</sup>; Pax9<sup>-/-</sup>* mutants) or when the growth defect is augmented by an environmental risk factor (*Msx1<sup>-/-</sup>* mutants exposed to hypoxia or phenytoin). Lnp, lateral nasal process; Mnp, medial nasal process; Mxp, maxillary process. Scale bars: 200  $\mu$ m.

Paternoster et al., 2012; Adhikari et al., 2016; Cole et al., 2016; Pickrell et al., 2016; Shaffer et al., 2016; Cha et al., 2018; Claes et al., 2018; Indencleef et al., 2018; Xiong et al., 2019), we identified 37 genes that were among the 632 genes included in GO:0009887 (33%, Table S5). Statistical assessment of whether the overlap between both gene sets was significant revealed a highly significant *P*-value ( $P < 10^{-16}$ , hypergeometric test), suggesting that the morphogenesis pathway also contributes to variation in facial traits in the general population.

## DISCUSSION

### Interaction between *Msx1* deficiency and hypoxia increases the risk for orofacial clefting

Our data show that transient exposure of pregnant mice to reduced respiratory oxygen levels during a crucial time-period of lip development is sufficient to cause cleft lip in *Msx1<sup>-/-</sup>* mouse embryos at an incidence of about 72% (0% cleft lip in *Msx1<sup>-/-</sup>*

embryos at normoxia), whereas none of the wild-type embryos showed this defect. In addition, more than 50% of *Msx1<sup>-/-</sup>* embryos developed a cleft lip when the pregnant mouse was injected with 60 mg/kg phenytoin (90% cleft lip at 85 mg/kg). In contrast, the incidence of cleft lip was extremely low in wild-type embryos (0% at 60 mg/kg phenytoin and 2% at 85 mg/kg phenytoin), consistent with previous results showing that CD1 mice are particularly resistant to the teratogenic effects of phenytoin (Hansen and Hodes, 1983; Azarbayjani et al., 2006). Together, the data reveals a strong, and specific, GE interaction involving deficiency of *Msx1* and transient hypoxia, which could also be relevant in the aetiology of orofacial clefting in humans.

Interestingly, low oxygen partial pressure is present at high altitude, which has been suggested to underlie an increased risk for cleft lip formation in Bolivia (Castilla et al., 1999) and might be a factor contributing to the increased risk for orofacial clefting in certain regions in China (Fan et al., 2018). Other conditions linked to orofacial clefting in humans might induce embryonic hypoxia during pregnancy at normoxia, including constriction of uterine vessels, placental insufficiency and life style factors such as smoking (Webster and Abela, 2007). Moreover, various pharmacologically relevant substances used in the treatment of epilepsy have been suggested to cause hypoxia directly in the developing embryo (Danielsson et al., 2007). The anticonvulsant drug phenytoin is an example of this group and our results clearly demonstrate that *Msx1* deficiency in mouse embryos greatly enhances susceptibility to the cleft lip-inducing effects of phenytoin. A high sensitivity to reduced *Msx1* gene dosage is also illustrated in *Msx1<sup>+/-</sup>* mutants with different genetic backgrounds, which form a cleft secondary palate at a high frequency when exposed to phenytoin (Fig. 1; M.N., unpublished). Previous work showed that combined *Msx1/ Msx2* deficiency is associated with impaired maturation of the endothelial layer of blood vessels, a defect secondary to the abnormal development of neural crest-derived vascular smooth muscle cells (Lopes et al., 2011). Similarly, *Msx1<sup>-/-</sup>* embryos show transiently impaired blood vessel formation during facial development (Medio et al., 2012). Our data showing reduced upregulation of the hypoxia markers *Hif1* and *Vegf* in *Msx1*-deficient Mnp exposed to phenytoin are consistent with these findings.

Additional research is warranted to investigate the molecular basis for the interaction between *Msx1* deficiency and phenytoin-induced hypoxia. Phenytoin is considered to cause irregular phases of embryonic hypoxia, which are followed by episodes of re-oxygenation and the formation of reactive oxygen species (Danielsson et al., 2007). *Msx1* could be involved in oxidative stress response; however, the strong interaction between *Msx1* deficiency and continuous exposure to reduced maternal oxygen levels argues that additional mechanism should also be considered.

Phenytoin was shown to inhibit a voltage-dependent  $K^+$  channel ( $I_{kr}$ ) that is expressed in the developing rodent heart.  $I_{kr}$  is encoded by an *ether-a-go-go-related* gene (*Kcnh2*, also known as *Erg*) and is particularly sensitive during the period of heart development that coincides with crucial stages of lip and palate formation (Danielsson et al., 2005a,b). Interestingly,  $I_{kr}$  blocking activities have been demonstrated for several anti-arrhythmics, but also for some antihistamines, antibiotics and antipsychotic drugs (Tamargo et al., 2004). With regards to orofacial clefting, epidemiological analyses have not yet produced conclusive data on the roles of these drugs. However, because these analyses were carried out on samples collected from a genetically highly heterogeneous population, it is conceivable that inconclusive results and low risk estimates might



**Table 1. Gene-based tests in genome-wide data on nonsyndromic cleft lip with or without cleft palate and its two main subtypes**

| Gene         | Region <sup>a</sup>        | Type <sup>b</sup> | nsCL/P   |                              |     | nsCLP    |                              |     | nsCLO    |                              |     |
|--------------|----------------------------|-------------------|----------|------------------------------|-----|----------|------------------------------|-----|----------|------------------------------|-----|
|              |                            |                   | <i>n</i> | <i>P</i> -value <sup>c</sup> | Per | <i>n</i> | <i>P</i> -value <sup>c</sup> | Per | <i>n</i> | <i>P</i> -value <sup>c</sup> | Per |
| <i>MSX1</i>  | Chr 4: 4811391-4915660     | Euro              | 1241     | 0.011                        | *   | 1235     | 0.042                        | *   | 1286     | 0.341                        | –   |
|              |                            | All               |          | <b>7.67×10<sup>-04</sup></b> | **  |          | <b>0.045</b>                 | *   |          | <b>0.020</b>                 | *   |
| <i>MSX2</i>  | Chr 5: 174101575-174207902 | Euro              | 852      | <b>0.029</b>                 | *   | 855      | 0.058                        | *   | 863      | <b>0.003</b>                 | *   |
|              |                            | All               |          | <b>0.029</b>                 | *   |          | 0.053                        | *   |          | <b>0.014</b>                 | *   |
| <i>PAX9</i>  | Chr 14: 37076772-37197011  | Euro              | 885      | 0.090                        | *   | 864      | 0.027                        | *   | 886      | 0.511                        | –   |
|              |                            | All               |          | <b>0.043</b>                 | *   |          | <b>0.018</b>                 | *   |          | 0.513                        | –   |
| <i>GREM1</i> | Chr 15: 32960204-33076870  | Euro              | 905      | <b>2.00×10<sup>-06</sup></b> | **  | 894      | <b>2.00×10<sup>-06</sup></b> | **  | 941      | 0.209                        | –   |
|              |                            | All               |          | <b>3.10×10<sup>-05</sup></b> | **  |          | <b>6.00×10<sup>-06</sup></b> | **  |          | 0.457                        | –   |
| <i>BMP4</i>  | Chr 14: 54366454-54473554  | Euro              | 678      | 0.105                        | –   | 683      | 0.337                        | –   | 685      | 0.608                        | –   |
|              |                            | All               |          | 0.347                        | –   |          | 0.727                        | –   |          | 0.198                        | –   |

nsCL/P, nonsyndromic cleft lip with or without a cleft palate; nsCLP, nonsyndromic cleft lip with a cleft palate; nsCLO, nonsyndromic cleft lip without a cleft palate; Chr, chromosome; *n*, number of SNPs; Per, number of permutations.

<sup>a</sup>Analysis included 50 kb up- and downstream of longest transcript, according to hg19.

<sup>b</sup>European (Euro) and multiethnic (All) meta-analyses, as described by Ludwig et al. (2017).

<sup>c</sup>VEGAS empirical *P*-values are genome-wide significant if lower than 2×10<sup>-06</sup> after 10<sup>6</sup> simulations. Bold indicates nominally significant.

Asterisks indicate the number of permutations performed (no asterisk, 10<sup>3</sup>; \*10<sup>5</sup>; \*\*10<sup>6</sup> permutations).

mask significantly increased risks in those patients that are genetically predisposed. Nevertheless, our results revealed that mutations in *Msx1* strongly interact with hypoxic stress during mouse lip development and the findings might therefore be useful for an improved risk assessment in patient groups affected by heterozygous mutations in *MSX1*: these patients are regularly affected by oligodontia (Fournier et al., 2018), a phenotype that is readily diagnosed and thus could be helpful to aid the development of targeted prevention strategies (e.g. during the early period of pregnancy).

### ***Msx1* deficiency induces *Pax9*-dependent morphogenetic regulation**

Identifying causative GE and GG interactions that underlie nonsyndromic forms of orofacial clefting in humans is a complex challenge. Although mutations in *MSX1* are frequently associated with nsCL/P, these birth defects are incompletely penetrant and phenotypes are highly variable across individuals within affected families (Gu et al., 2018). Previous work has shown that absence of *Msx1* and *Msx2* in mouse embryos results in severely growth-retarded craniofacial processes (Ishii et al., 2005), defects that clearly predispose to cleft palate and cleft lip. Here we show that a reduction in Mnp size is associated with a moderate but significant alteration of Mnp shape (Fig. 2), a finding that has not been described before. The enhanced curvature of the Mnp appears to facilitate contact with the Mxp to complete lip formation. We propose that the capacity of the Mnp to react to growth retardation by inducing a favourable alteration of Mnp shape represents a ‘morphogenetic regulation’. Compared with the midfacial development of other mammals, the evolutionary shortening of the maxilla and depressed midfacial anatomy typically seen in primates, in particular in the hominid clade (Lacruz et al., 2019), requires that the growth of their midfacial area is naturally suppressed during development. It is therefore tempting to speculate that a morphogenetic regulation that compensates for a genetically caused growth defect might be crucially important, specifically in humans. Our data suggest that morphogenetic regulation could be a significant component of the ‘developmental robustness’ of lip formation in humans; its disruption may therefore be considered a novel pathogenic mechanism in the aetiology of cleft lip.

The morphogenetic regulation that enhances Mnp curvature in *Msx1*<sup>-/-</sup> embryos is *Pax9* dependent and provides a mechanistic explanation for the negative epistasis between *Msx1* and *Pax9* in lip

development. The lack of a distinct Mnp curvature in *Pax9*-deficient embryos is reminiscent of morphogenetic disruption of the secondary palatal shelves in these mutants. Similar to the Mnp, the secondary palatal shelves are not growth retarded but show a distinct absence of indentations on the oral side (Peters et al., 1998; Zhou et al., 2013; Jia et al., 2017). Both Mnp and palatal shelves of *Pax9*<sup>-/-</sup> mutant embryos appear bulky and uniformly shaped, defects that clearly reveal an important role for *Pax9* in the morphogenesis of both structures during a crucial period of development. With respect to lip formation, we show that the expression domain of *Pax9* in the Mnp is controlled by *Msx1* and involves *Msx1*-regulated expression of *Bmp4*. Interestingly, the shift of *Bmp4* expression from the epithelium to the mesenchyme (Gong and Guo, 2003) correlates with the gradual restriction of *Pax9* expression to the proximal region of the developing Mnp by *Bmp4*. Together, the interactions involving *Msx1*, *Pax9*, *Bmp4* and *Grem1* might contribute to a molecular network that continuously coordinates the growth and shape of the Mnp during a crucial period of lip development (Fig. 5E). Although the functions of *Grem1* in Mnp morphogenesis remain to be tested *in vivo* using appropriate genetic modelling, important roles for *GREM1* in human nose and lip development have been indicated by a strong association between polymorphisms at the *GREM1* locus and nose width (Boehringer et al., 2011), and by genome-wide significant associations between variants at the *GREM1* locus and nsCLP (Ludwig et al., 2016) and other forms of orofacial clefting (Gowans et al., 2018; Wang et al., 2018; Rafighdoost et al., 2019).

The mechanism by which *Pax9* controls morphogenesis of the Mnp remains to be elucidated. *Pax9* might be involved in regulating differential growth directly within different areas in the Mnp. The function of *Pax9* might also affect Mnp development by regulating growth of the primary palate, which could contribute to lateral displacement of the distal regions of the Mnp and is affected in *Pax9*<sup>-/-</sup> embryos (Jia et al., 2017; Li et al., 2017). Moreover, the irregular and extended nasal pit in *Pax9*<sup>-/-</sup> mutant embryos might indicate that *Pax9* is also required for regulating efficient epithelial fusion between Mnp and Lnp at the lambdoid junction. Interestingly, Wnt signalling has been shown to play a crucial role in this process (Ferretti et al., 2011; reviewed by Reynolds et al., 2019), and inhibition of secreted antagonists of Wnt signalling are sufficient to rescue cleft palate in *Pax9*-deficient mouse embryos (Jia et al., 2017; Li et al., 2017).



## Orofacial clefts and facial morphogenesis

GWAS have established significant associations of regions around *MSX1*, *PAX9* and *GREM1* in the aetiology of orofacial clefts in humans of different ethnic origins (Yu et al., 2017; Huang et al., 2019; Ludwig et al., 2016; Table 1). Although genome-wide significance for loci around *BMP4* and *MSX2* in human orofacial clefting remains to be demonstrated, analyses of mouse mutant embryos have shown that, except for *Grem1*, all five genes regulate the development of both secondary palate and lip (Satokata and Maas, 1994; Liu et al., 2005; Suzuki et al., 2009; Nakatomi et al., 2010; Parada and Chai, 2012; Ludwig et al., 2016; this work). Interestingly, our pathway analysis identified a genome-wide significant overrepresentation of common DNA variants in the ‘organ morphogenesis’ for nsCLP but not nsCPO, which points to the importance of the genes (in particular those analysed in this study) in this specific orofacial clefting subphenotype. The genome-wide significance of the *MSX1* locus for nsCLP (Yu et al., 2017) supports this view.

Regarding lip development, our data suggest that all five genes studied in this work participate in a genetic network that controls Mnp morphogenesis during a crucial period of lip formation in mice (Fig. 5E). Although overt clefts of the lip represent a clinically relevant outcome of impaired lip development in humans, more subtle genetic alterations are increasingly recognized to manifest as milder phenotypes affecting lip and mid-facial morphology in the unaffected population (Boehringer et al., 2011; Liu et al., 2012; Miller et al., 2014; Wilson-Nagrani et al., 2018; Xiong et al., 2019). Our comparison identified a considerable overlap between genes identified in the ‘organ morphogenesis’ pathway and those associated with facial variations, thus supporting the concept of shared genetic effects on orofacial clefting and variations of facial development.

## MATERIALS AND METHODS

### Mice

All experimental procedures were carried out under a project licence evaluated by the Newcastle University Local Ethics Committee and approved by the Home Office (UK), the Institutional Animal Care and Use Committee of Niigata University and the Kyushu Dental University Animal Care and Use Committee. Single heterozygous mice of *Msx1* (Satokata and Maas, 1994) were maintained on a CD1 (Newcastle University) or C57BL/6 (Niigata Univ. and Kyushu Dental Univ.) genetic background. Wild-type or *Msx1*<sup>+/-</sup> mice were used as controls. Single heterozygous mice of *Pax9* (Peters et al., 1998) and *Msx2* (Satokata et al., 2000) and combined double heterozygous mice of *Pax9*;*Msx1* and *Msx1*; *Msx2* were maintained on a CD1 background. *Pax9*<sup>flax</sup> and *PGK-Cre* mice (Kist et al., 2007; Lallemand et al., 1998) were propagated on a C57BL/6 background. The day of vaginal plug detection was designated as E0.5. At least three samples of each genotype were collected and analysed.

### Human foetal sections

Human foetal tissue sections were obtained from the MRC/Wellcome Trust-funded Human Developmental Biology Resource at Newcastle University (HDBR; <http://www.hdb.org>), with appropriate maternal written consent and approval from the Newcastle and North Tyneside NHS Health Authority Joint Ethics Committee. HDBR is a licensed research tissue bank with the UK Human Tissue Authority.

### Whole-mount and section *in situ* hybridization

Embryos were dissected and fixed with 4% paraformaldehyde (PFA) in phosphate buffered saline (PBS) at 4°C for overnight. For whole-mount *in situ* hybridization, samples were dehydrated through a graded series of methanol. For section *in situ* hybridization and immunohistochemistry, samples were dehydrated through a graded series of ethanol and xylene,

embedded in paraffin and cut into 4 µm frontal sections. Non-radioactive whole-mount and section *in situ* hybridizations were carried out as previously described (Nakatomi et al., 2010). The *MSX1 in situ* probe was generated by PCR amplification using SP6 and T7 tagged primers 5'-AA-TACGATTAGGTGACACTATAGAATACGTGCCTCTGGCCCCCTTC-CAGCGCG-3' and 5'-TAAGTTAATACGACTCACTATAGGGCGAA-CATAGTACACAATCCCTTCCA-3'.

### Immunohistochemistry

For immunohistochemical analysis, sections were treated with anti-phospho-Smad1/5 primary antibody (rabbit monoclonal, #9516, Cell Signaling Technology, Danvers, MA, USA; 1:200 dilution), anti-rabbit secondary antibody (#BA-1000, Vector Laboratories, Burlingame, CA, USA; 1:500 dilution) and Vectastain Elite ABC kit (Vector; 1:50 dilution), essentially according to the manufacturers' instructions. Sigmafast 3, 3'-diaminobenzidine (DAB) tablets (Sigma-Aldrich, St Louis, MO, USA) were used for colour reaction, followed by counterstaining with diluted haematoxylin. A negative control experiment replacing primary antibody with PBS did not yield significant staining. For cell counting, a 200×50 µm rectangle was set at the mesial corner of the mesial nasal process, where *Msx1* is intensely expressed, of both right and left sides of three serial sections (in total, six rectangles per individual) using Adobe Photoshop CS software (Adobe Systems, San Jose, CA, USA). The ratio of DAB-positive cells to total cells in the rectangle was measured using ImmunoRatio free web application (<https://biii.eu/immunoratio>; Tuominen et al., 2010). The average of six rectangles was calculated to obtain a pSmad score for each individual area; Student's *t*-test (two-tailed) was carried out to compare controls with *Msx1*<sup>-/-</sup> mutant embryos (*n*=4 each). PAX9 immunostaining on human sections was carried out as previously described (Kist et al., 2014) using DAB as a chromogen.

### Phenytoin experiments

Phenytoin injection was performed as previously reported (Azarbayjani and Danielsson, 2001). Briefly, phenytoin sodium salt (Sigma-Aldrich) was freshly dissolved in 0.9% NaCl (pH 11.7) and intraperitoneally injected into pregnant *Msx1*<sup>+/-</sup> mice (CD1 background) at 11 am at both E10.5 and 11.5 at different concentrations (35, 60 and 85 mg/kg body weight). Embryos were dissected at E15.5 and fixed with Bouin's fixative after recording facial cleft state. Chi-square test was carried out for statistical analysis regarding the occurrence of cleft lip between wild-type (*n*=98, 85 mg/kg; 39, 60 mg/kg; 28, 35 mg/kg) and *Msx1*<sup>-/-</sup> (*n*=12, 85 mg/kg; 19, 60 mg/kg; 18, 35 mg/kg) embryos. To label hypoxic cells, pimonidazole (60 mg/kg body weight) contained in a Hypoxyprobe-1 Plus Kit (Hypoxyprobe, Burlington, MA, USA) was intraperitoneally injected into pregnant mice 1 h before sacrifice at E11.5, after phenytoin injection as described above. Labelled cells in frontally cut paraffin sections were immunohistochemically visualized using primary antibody (anti-FITC-MAb1; 1:100 dilution), secondary antibody (HRP-conjugated rabbit anti-FITC; 1:400 dilution) and DAB tablets (Sigma-Aldrich), followed by counterstaining with diluted haematoxylin.

### Hypoxic chamber experiment

For hypoxia experiments, pregnant *Msx1*<sup>+/-</sup> mice (C57BL/6 background) were kept in an airtight chamber (Deuce Co., Tokyo, Japan) in which the O<sub>2</sub> concentration was maintained at 10% for 48 h from E10.5 to E12.5. The oxygen concentration was continuously monitored with an oxygen analyser (JKO-25MT II R, Ichinen Jikco, Tokyo, Japan). Then, embryos were dissected at E15.5 and fixed with Bouin's fixative to analyse lip phenotype. Chi-square test was carried out for statistical analysis regarding the occurrence of cleft lip between wild-type (*n*=3) and *Msx1*<sup>-/-</sup> (*n*=8) embryos.

### Rescue experiment

To examine whether a hyperoxic environment can rescue phenytoin-induced cleft lip, pregnant *Msx1*<sup>+/-</sup> mice (C57BL/6 background) were injected with phenytoin (60 mg/kg) once a day at E10.5 and E11.5 and kept at 50% O<sub>2</sub> concentration in the airtight chamber for 48 h from E10.5 to E12.5. The oxygen concentration was continuously monitored with an

oxygen analyser. Then, embryos were dissected at E15.5 and fixed with Bouin's fixative to analyse lip phenotype. Phenytoin injection on pregnant *Msx1*<sup>+/-</sup> mice (C57BL/6 background) under the same conditions in a normoxic environment was performed as control. Chi-square test was carried out for statistical analysis regarding the occurrence of cleft lip between normoxic (*n*=7) and hyperoxic (*n*=11) groups of *Msx1*<sup>-/-</sup> mice.

### Whole-mount X-gal staining

Dissected embryos were fixed with 1% formaldehyde in PBS containing 0.02% NP-40 (PBS-NP) at 4°C for 20 min. Samples were washed three times with PBS-NP at room temperature for 15 min and incubated with staining buffer (2 mM MgCl<sub>2</sub>, 5 mM K<sub>4</sub>Fe(CN)<sub>6</sub>·3H<sub>2</sub>O, 5 mM K<sub>3</sub>Fe(CN)<sub>6</sub> and 1 mg/ml X-gal in PBS-NP) at 37°C overnight, followed by several rinses with PBS.

### Scanning electron microscopy and morphometric measurements

Embryos were dissected and fixed with 2% glutaraldehyde in Sorenson's phosphate buffer at 4°C overnight. Subsequent tissue processing and scanning electron microscopy (SEM) were carried out according to a standard protocol at the Electron Microscopy Research Services, Newcastle University, UK. The oral and nasal angles of the medial nasal process were measured using Adobe Photoshop CS software (Adobe Systems). Student's *t*-test (two-tailed) was performed for the comparison of the oral or nasal angles; *n*=42 (WT), 16 (*Msx1*<sup>-/-</sup>), 14 (*Pax9*<sup>-/-</sup>) and 17 (*Msx1*<sup>-/-</sup>;*Pax9*<sup>-/-</sup>).

### Organ culture

Affi-gel blue beads (Bio-Rad Laboratories, USA) were soaked with 500 µg/ml human recombinant BMP4 protein (R&D Systems, USA) or control PBS. Mouse embryos (E10.5) were harvested and the facial regions dissected prior to bead implantation into the Mnp. Samples were cultured by Trowel's standard method with Dulbecco's modified Eagle's medium (Sigma-Aldrich, USA) including antibiotics and 10% foetal bovine serum. After 8 h, cultured wild-type samples were fixed with 4% PFA for whole-mount *in situ* hybridization; *Pax9*<sup>+lacZ</sup> samples were fixed with 1% PFA in PBS for X-gal staining.

### Gene-based association and pathway analysis

To test for association between each trait (nsCL/P, nsCLO and nsCLP) and common SNPs in each of the genes considered in this study (*MSX1*, *MSX2*, *BMP4*, *PAX9*, *GREMI*), a set-based test implemented in VEGAS2 (Liu et al., 2010) was performed (script accessed at <https://vegass2.qimrberghofer.edu.au/>, January 2017). To this end, we used our previous in-house meta-analysis data (Ludwig et al., 2017), which contained imputed data for nsCL/P, nsCLO and nsCLP. For each of the five genes, we extracted *P*-values for all common variants at the respective genetic loci (±50 kb, minor allele frequency >1%, info-score >0.4) and calculated whether there was an enrichment of SNPs with significant association *P*-values, while accounting for linkage disequilibrium (LD) between markers. An empirical *P*-value for the 10% top SNPs was calculated as the proportion of permuted test statistics less than the observed test statistics in each gene, with the numbers of permutations increasing depending on the *P*-value obtained.

To identify pathways in which genes with significant *P*-values from this gene-based test were overrepresented, an adapted version of VEGAS2 (VEGAS2-pathway analysis) was used. For this, gene-based *P*-values were calculated for all RefSeq genes and used as input. This tool additionally requires a 'gene-pathway annotation' file, in which GO pathways are defined and genes are assigned to those pathways. For the present analysis, we used the 'Biosystems gene-pathway annotation file', as available at the VEGAS2 homepage (January 2017). PubMed and OMIM databases available at the National Centre for Biotechnology Information platform ([www.ncbi.nlm.nih.gov/](http://www.ncbi.nlm.nih.gov/)) were used to search for genes with documented roles in lip, palate and facial development.

### Acknowledgements

We thank J. Currie for PAX9 immunohistochemical staining on human embryo sections, L. Weinhold for statistical counselling and the team at the Electron Microscopy Research Services of Newcastle University for carrying out the SEM.

We also thank L. Wolpert and J. Davies for earlier discussions about morphogenetic regulation. The human embryonic and foetal material was provided by the Joint MRC/Wellcome (MR/R006237/1) Human Developmental Biology Resource ([www.hdbr.org](http://www.hdbr.org)).

### Competing interests

The authors declare no competing or financial interests.

### Author contributions

Conceptualization: M.N., K.U.L., E.M., H.P.; Methodology: M.N., K.U.L., H.P.; Software: M.K.; Validation: M.N., K.U.L., M.K., E.M., H.P.; Formal analysis: M.N., K.U.L., M.K., E.M., H.P.; Investigation: M.N., K.U.L., S.L., E.M., H.P.; Resources: E.M., R.K., H.O., H.P.; Data curation: M.N., K.U.L., M.K., E.M., H.P.; Writing - original draft: H.P.; Writing - review & editing: M.N., K.U.L., R.K., H.P.; Visualization: H.P.; Supervision: H.P.; Project administration: M.N., H.P.; Funding acquisition: K.U.L., M.N., H.P.

### Funding

This work was supported by the Medical Research Council (UK) (G0400679 to H.P.), the Newlife Foundation for Disabled Children (UK) (SG/13-14/05 to H.P.), the Deutsche Forschungsgemeinschaft (LU 1944/3-1 to K.U.L.) and the Japan Society for the Promotion of Science KAKENHI (23792098 and 15K11019 to M.N.).

### Supplementary information

Supplementary information available online at <https://dev.biologists.org/lookup/doi/10.1242/dev.189175.supplemental>

### References

- Adhikari, K., Fuentes-Guajardo, M., Quinto-Sánchez, M., Mendoza-Revilla, J., Camilo Chacón-Duque, J., Acuña-Alonzo, V., Jaramillo, C., Arias, W., Lozano, R. B., Pérez, G. M. et al. (2016). A genome-wide association scan implicates *DCHS2*, *RUNX2*, *GLI3*, *PAX1* and *EDAR* in human facial variation. *Nat. Commun.* **7**, 11616. doi:10.1038/ncomms11616
- Arteel, G. E., Thurman, R. G., Yates, J. M. and Raleigh, J. A. (1995). Evidence that hypoxia markers detect oxygen gradients in liver: pimonidazole and retrograde perfusion of rat liver. *Br. J. Cancer* **72**, 889-895. doi:10.1038/bjc.1995.429
- Azarbayjani, F. and Danielsson, B. R. (2001). Phenytoin-induced cleft palate: evidence for embryonic cardiac bradyarrhythmia due to inhibition of delayed rectifier K<sup>+</sup> channels resulting in hypoxia-reoxygenation damage. *Teratology* **63**, 152-160. doi:10.1002/tera.1026
- Azarbayjani, F., Borg, L. A. H. and Danielsson, B. R. (2006). Increased susceptibility to phenytoin teratogenicity: excessive generation of reactive oxygen species or impaired antioxidant defense? *Basic Clin. Pharmacol. Toxicol.* **99**, 305-311. doi:10.1111/j.1742-7843.2006.pto\_416.x
- Beaty, T. H., Hetmanski, J. B., Zeiger, J. S., Fan, Y. T., Liang, K. Y., VanderKolk, C. A. and McIntosh, I. (2002). Testing candidate genes for non-syndromic oral clefts using a case-parent trio design. *Genet. Epidemiol.* **22**, 1-11. doi:10.1002/gepi.1039
- Beaty, T. H., Murray, J. C., Marazita, M. L., Munger, R. G., Ruczinski, I., Hetmanski, J. B., Liang, K. Y., Wu, T., Murray, T., Fallin, M. D. et al. (2010). A genome-wide association study of cleft lip with and without cleft palate identifies risk variants near MAFB and ABCA4. *Nat. Genet.* **42**, 525-529. doi:10.1038/ng.580
- Birnbaum, S., Ludwig, K. U., Reutter, H., Herms, S., Steffens, M., Rubini, M., Baluardo, C., Ferrian, M., Almeida de Assis, N., Alblas, M. A. et al. (2009). Key susceptibility locus for nonsyndromic cleft lip with or without cleft palate on chromosome 8q24. *Nat. Genet.* **41**, 473-477. doi:10.1038/ng.333
- Boehringer, S., van der Lijn, F., Liu, F., Günther, M., Sinigerova, S., Nowak, S., Ludwig, K. U., Herberz, R., Klein, S., Hofman, A. et al. (2011). Genetic determination of human facial morphology: links between cleft-lips and normal variation. *Eur. J. Hum. Genet.* **19**, 1192-1197. doi:10.1038/ejhg.2011.110
- Bronsky, P. T., Johnston, M. C. and Sulik, K. K. (1986). Morphogenesis of hypoxia-induced cleft lip in CL/Fr mice. *J. Craniofac. Genet. Dev. Biol. Suppl.* **2**, 113-128.
- Butali, A., Mossey, P. A., Adeyemo, W. L., Eshete, M. A., Gowans, L. J. J., Busch, T. D., Jain, D., Yu, W., Huan, L., Laurie, C. A. et al. (2019). Genomic analyses in African populations identify novel risk loci for cleft palate. *Hum. Mol. Genet.* **28**, 1038-1051. doi:10.1093/hmg/ddy402
- Carmichael, S. L., Shaw, G. M., Yang, W., Lammer, E. J., Zhu, H. and Finnell, R. H. (2004). Limb deficiency defects, *MSX1*, and exposure to tobacco smoke. *Am. J. Med. Genet. A* **125A**, 285-289. doi:10.1002/ajmg.a.20517
- Castilla, E. E., Lopez-Camelo, J. S. and Campaña, H. (1999). Altitude as a risk factor for congenital anomalies. *Am. J. Med. Genet.* **86**, 9-14. doi:10.1002/(SICI)1096-8628(19990903)86:1<9::AID-AJMG3>3.0.CO;2-X
- Cha, S., Lim, J. E., Park, A. Y., Do, J.-H., Lee, S. W., Shin, C., Cho, N. H., Kang, J.-O., Nam, J. M., Kim, J.-S. et al. (2018). Identification of five novel genetic loci related to facial morphology by genome-wide association studies. *BMC Genomics* **19**, 481. doi:10.1186/s12864-018-4865-9



- Chai, Y. and Maxson, R. E. Jr. (2006). Recent advances in craniofacial morphogenesis. *Dev. Dyn.* **235**, 2353-2375. doi:10.1002/dvdy.20833
- Chen, Y., Bei, M., Woo, I., Satokata, I. and Maas, R. (1996). *Msx1* controls inductive signaling in mammalian tooth morphogenesis. *Development* **122**, 3035-3044.
- Claes, P., Roosenboom, J., White, J. D., Swigut, T., Sero, D., Li, J., Lee, M. K., Zaidi, A., Mattern, B. C., Liebowitz, C. et al. (2018). Genome-wide mapping of global-to-local genetic effects on human facial shape. *Nat. Genet.* **50**, 414-423. doi:10.1038/s41588-018-0057-4
- Cole, J. B., Manyama, M., Kimwaga, E., Mathayo, J., Larson, J. R., Liberton, D. K., Lukowiak, K., Ferrara, T. M., Riccardi, S. L., Li, M. et al. (2016). Genomewide association study of African children identifies association of *SCHIP1* and *PDE8A* with facial size and shape. *PLoS Genet.* **12**, e1006174. doi:10.1371/journal.pgen.1006174
- Danielsson, B. R., Sköld, A.-C., Johansson, A., Dillner, B. and Blomgren, B. (2003). Teratogenicity by the hERG potassium channel blocking drug almokalant: use of hypoxia marker gives evidence for a hypoxia-related mechanism mediated via embryonic arrhythmia. *Toxicol. Appl. Pharmacol.* **193**, 168-176. doi:10.1016/j.taap.2003.07.002
- Danielsson, B. R., Johansson, A., Danielsson, C., Azarbayjani, F., Blomgren, B. and Sköld, A.-C. (2005a). Phenytoin teratogenicity: hypoxia marker and effects on embryonic heart rhythm suggest an hERG-related mechanism. *Birth Defects Res. A Clin. Mol. Teratol.* **73**, 146-153. doi:10.1002/bdra.20124
- Danielsson, B. R., Lansdell, K., Patmore, L. and Tomson, T. (2005b). Effects of the antiepileptic drugs lamotrigine, topiramate and gabapentin on hERG potassium currents. *Epilepsy Res.* **63**, 17-25. doi:10.1016/j.eplepsyres.2004.10.002
- Danielsson, B. R., Danielsson, C. and Nilsson, M. F. (2007). Embryonic cardiac arrhythmia and generation of reactive oxygen species: common teratogenic mechanism for IKr blocking drugs. *Reprod. Toxicol.* **24**, 42-56. doi:10.1016/j.reprotox.2007.04.005
- Dixon, M. J., Marazita, M. L., Beaty, T. H. and Murray, J. C. (2011). Cleft lip and palate: understanding genetic and environmental influences. *Nat. Rev. Genet.* **12**, 167-178. doi:10.1038/nrg2933
- Dunwoodie, S. L. (2009). The role of hypoxia in development of the mammalian embryo. *Dev. Cell* **17**, 755-773. doi:10.1016/j.devcel.2009.11.008
- Fallin, M. D., Hetmanski, J. B., Park, J., Scott, A. F., Ingersoll, R., Fuernkranz, H. A., McIntosh, I. and Beaty, T. H. (2003). Family-based analysis of *MSX1* haplotypes for association with oral clefts. *Genet. Epidemiol.* **25**, 168-175. doi:10.1002/gepi.10255
- Fan, D., Wu, S., Liu, L., Xia, Q., Tian, G., Wang, W., Ye, S., Wang, L., Rao, J., Yang, X. et al. (2018). Prevalence of non-syndromic orofacial clefts: based on 15,094,978 Chinese perinatal infants. *Oncotarget* **9**, 13981-13990. doi:10.18632/oncotarget.24238
- Ferretti, E., Li, B., Zewdu, R., Wells, V., Hebert, J. M., Karner, C., Anderson, M. J., Williams, T., Dixon, J., Dixon, M. J. et al. (2011). A conserved Pbx-Wnt-p63-Irf6 regulatory module controls face morphogenesis by promoting epithelial apoptosis. *Dev. Cell* **21**, 627-641. doi:10.1016/j.devcel.2011.08.005
- Fournier, B. P., Bruneau, M. H., Toupenay, S., Kerner, S., Berdal, A., Cormier-Daire, V., Hadj-Rabia, S., Coudert, A. E. and de La Dure-Molla, M. (2018). Patterns of dental agenesis highlight the nature of the causative mutated genes. *J. Dent. Res.* **97**, 1306-1316. doi:10.1177/0022034518777460
- Geoghegan, F., Xavier, G. M., Birjandi, A. A., Seppala, M. and Cobourne, M. T. (2017). *Vax1* plays an indirect role in the etiology of murine cleft palate. *J. Dent. Res.* **96**, 1555-1562. doi:10.1177/0022034517724145
- Gong, S.-G. and Guo, C. (2003). *Bmp4* gene is expressed at the putative site of fusion in the midfacial region. *Differentiation* **71**, 228-236. doi:10.1046/j.1432-0436.2003.710304.x
- Gowans, L. J. J., Adeyemo, W. L., Eshete, M., Mossey, P. A., Busch, T., Aregbesola, B., Donkor, P., Arthur, F. K. N., Bello, S. A., Martinez, A. et al. (2016). Association studies and direct DNA sequencing implicate genetic susceptibility loci in the etiology of nonsyndromic orofacial clefts in sub-Saharan African populations. *J. Dent. Res.* **95**, 1245-1256. doi:10.1177/0022034516657003
- Gowans, L. J. J., Oseni, G., Mossey, P. A., Adeyemo, W. L., Eshete, M. A., Busch, T. D., Donkor, P., Obiri-Yeboah, S., Plange-Rhule, G., Oti, A. A. et al. (2018). Novel *GREM1* variations in sub-Saharan African patients with cleft lip and/or cleft palate. *Cleft Palate Craniofac. J.* **55**, 736-742. doi:10.1177/1055665618754948
- Grant, S. F. A., Wang, K., Zhang, H., Glaberson, W., Annaiah, K., Kim, C. E., Bradfield, J. P., Glessner, J. T., Thomas, K. A., Garris, M. et al. (2009). A genome-wide association study identifies a locus for nonsyndromic cleft lip with or without cleft palate on 8q24. *J. Pediatr.* **155**, 909-913. doi:10.1016/j.jpeds.2009.06.020
- Gritli-Linde, A. (2012). The mouse as a developmental model for cleft lip and palate research. *Front. Oral Biol.* **16**, 32-51. doi:10.1159/000337523
- Gu, M., Zhang, Y., Liu, H., Liu, J., Zhu, D. and Yang, X. (2018). *MSH* homeobox 1 polymorphisms and the risk of non-syndromic orofacial clefts: a meta-analysis. *Eur. J. Oral Sci.* **126**, 180-185. doi:10.1111/eos.12414
- Hansen, D. K. and Hodes, M. E. (1983). Comparative teratogenicity of phenytoin among several inbred strains of mice. *Teratology* **28**, 175-179. doi:10.1002/tera.1420280205
- He, F., Xiong, W., Wang, Y., Matsui, M., Yu, X., Chai, Y., Klingensmith, J. and Chen, Y. P. (2010). Modulation of BMP signaling by Noggin is required for the maintenance of palatal epithelial integrity during palatogenesis. *Dev. Biol.* **347**, 109-121. doi:10.1016/j.ydbio.2010.08.014
- Hsu, D. R., Economides, A. N., Wang, X., Eimon, P. M. and Harland, R. M. (1998). The Xenopus dorsalizing factor Gremlin identifies a novel family of secreted proteins that antagonize BMP activities. *Mol. Cell* **1**, 673-683. doi:10.1016/S1097-2765(00)80067-2
- Huang, L., Jia, Z., Shi, Y., Du, Q., Shi, J., Wang, Z., Mou, Y., Wang, Q. et al. (2019). Genetic factors define CPO and CLO subtypes of nonsyndromic orofacial cleft. *PLoS Genet.* **15**, e1008357. doi:10.1371/journal.pgen.1008357
- Hwang, S.-J., Beaty, T. H., McIntosh, I., Hefferon, T. and Panny, S. R. (1998). Association between homeobox-containing gene *MSX1* and the occurrence of limb deficiency. *Am. J. Med. Genet.* **75**, 419-423. doi:10.1002/(SICI)1096-8628(19980203)75:4<419::AID-AJMG14>3.0.CO;2-R
- Indencleef, K., Roosenboom, J., Hoskens, H., White, J. D., Shriver, M. D., Richmond, S., Peeters, H., Feingold, E., Marazita, M. L., Shaffer, J. R. et al. (2018). Six NSCLP loci show associations with normal-range craniofacial variation. *Front. Genet.* **9**, 502. doi:10.3389/fgene.2018.00502
- Ishii, M., Han, J., Yen, H.-Y., Sucov, H. M., Chai, Y. and Maxson, R. E. Jr. (2005). Combined deficiencies of *Msx1* and *Msx2* cause impaired patterning and survival of the cranial neural crest. *Development* **132**, 4937-4950. doi:10.1242/dev.02072
- Jagomägi, T., Nikopensius, T., Krjutškova, K., Tammekeivi, V., Viltrop, T., Saag, M. and Metspalu, A. (2010). *MTHFR* and *MSX1* contribute to the risk of nonsyndromic cleft lip/palate. *Eur. J. Oral Sci.* **118**, 213-220. doi:10.1111/j.1600-0722.2010.00729.x
- Jezewski, P. A., Vieira, A. R., Nishimura, C., Ludwig, B., Johnson, M., O'Brien, S. E., Daack-Hirsch, S., Schultz, R. E., Weber, A., Nepomucena, B. et al. (2003). Complete sequencing shows a role for *MSX1* in non-syndromic cleft lip and palate. *J. Med. Genet.* **40**, 399-407. doi:10.1136/jmg.40.6.399
- Jia, S., Zhou, J., Fanelli, C., Wee, Y., Bonds, J., Schneider, P., Mues, G. and D'Souza, R. N. (2017). Small-molecule Wnt agonists correct cleft palates in *Pax9* mutant mice in utero. *Development* **144**, 3819-3828. doi:10.1242/dev.157750
- Kist, R., Greally, E. and Peters, H. (2007). Derivation of a mouse model for conditional inactivation of *Pax9*. *Genesis* **45**, 460-464. doi:10.1002/dvg.20295
- Kist, R., Watson, M., Crosier, M., Robinson, M., Fuchs, J., Reichelt, J. and Peters, H. (2014). The formation of endoderm-derived taste sensory organs requires a *Pax9*-dependent expansion of embryonic taste bud progenitor cells. *PLoS Genet.* **10**, e1004709. doi:10.1371/journal.pgen.1004709
- Kousa, Y. A. and Schutte, B. C. (2016). Toward an orofacial gene regulatory network. *Dev. Dyn.* **245**, 220-232. doi:10.1002/dvdy.24341
- Kurosaka, H., Iulianella, A., Williams, T. and Trainor, P. A. (2014). Disrupting hedgehog and WNT signaling interactions promotes cleft lip pathogenesis. *J. Clin. Invest.* **124**, 1660-1671. doi:10.1171/journal.pgen.1008357
- Lacruz, R. S., Stringer, C. B., Kimbel, W. H., Wood, B., Harvati, K., O'Higgins, P., Bromage, T. G. and Arsuaga, J.-L. (2019). The evolutionary history of the human face. *Nat. Ecol. Evol.* **3**, 726-736. doi:10.1038/s41559-019-0865-7
- Lallemand, Y., Luria, V., Haffner-Krausz, R. and Lonai, P. (1998). Maternally expressed PGK-Cre transgene as a tool for early and uniform activation of the Cre site-specific recombinase. *Transgenic Res.* **7**, 105-112. doi:10.1023/A:1008868325009
- Lallemand, Y., Nicola, M.-A., Ramos, C., Bach, A., Cloment, C. S. and Robert, B. (2005). Analysis of *Msx1*; *Msx2* double mutants reveals multiple roles for *Msx* genes in limb development. *Development* **132**, 3003-3014. doi:10.1242/dev.01877
- Leslie, E. J., Carlson, J. C., Shaffer, J. R., Feingold, E., Wehby, G., Laurie, C. A., Jain, D., Laurie, C. C., Doheny, K. F., McHenry, T. et al. (2016). A multi-ethnic genome-wide association study identifies novel loci for non-syndromic cleft lip with or without cleft palate on 2p24.2, 17q23 and 19q13. *Hum. Mol. Genet.* **25**, 2862-2872. doi:10.1093/hmg/ddw104
- Li, C., Lan, Y., Krumlauf, R. and Jiang, R. (2017). Modulating Wnt signaling rescues palate morphogenesis in *Pax9* mutant mice. *J. Dent. Res.* **96**, 1273-1281. doi:10.1177/0022034517719865
- Lidral, A. C., Romitti, P. A., Basart, A. M., Doetschman, T., Leysens, N. J., Daack-Hirsch, S., Semina, E. V., Johnson, L. R., Machida, J., Burds, A. et al. (1998). Association of *MSX1* and *TGFB3* with nonsyndromic clefting in humans. *Am. J. Hum. Genet.* **63**, 557-568. doi:10.1086/301956
- Liu, W., Sun, X., Braut, A., Mishina, Y., Behringer, R. R., Mina, M. and Martin, J. F. (2005). Distinct functions for Bmp signaling in lip and palate fusion in mice. *Development* **132**, 1453-1461. doi:10.1242/dev.01676
- Liu, J. Z., McRae, A. F., Nyholt, D. R., Medland, S. E., Wray, N. R., Brown, K. M., AMFS Investigators, Hayward, N. K., Montgomery, G. W., Visscher, P. M. et al. (2010). A versatile gene-based test for genome-wide association studies. *Am. J. Hum. Genet.* **87**, 139-145. doi:10.1016/j.ajhg.2010.06.009
- Liu, F., van der Lijn, F., Schurmann, C., Zhu, G., Chakravarty, M. M., Hysi, P. G., Wollstein, A., Lao, O., de Bruijne, M., Ikram, M. A. et al. (2012). A genome-wide association study identifies five loci influencing facial morphology in Europeans. *PLoS Genet.* **8**, e1002932. doi:10.1371/journal.pgen.1002932
- Lopes, M., Goupille, O., Saint Cloment, C., Lallemand, Y., Cumano, A. and Robert, B. (2011). *Msx* genes define a population of mural cell precursors

- required for head blood vessel maturation. *Development* **138**, 3055-3066. doi:10.1242/dev.063214
- Ludwig, K. U., Mangold, E., Herms, S., Nowak, S., Reutter, H., Paul, A., Becker, J., Herberz, R., AlChawa, T., Nasser, E. et al. (2012). Genome-wide meta-analyses of nonsyndromic cleft lip with or without cleft palate identify six new risk loci. *Nat. Genet.* **44**, 968-971. doi:10.1038/ng.2360
- Ludwig, K. U., Ahmed, S. T., Böhmer, A. C., Sangani, N. B., Varghese, S., Klamt, J., Schuenke, H., Gültepe, P., Hoffmann, A., Rubini, M. et al. (2016). Meta-analysis reveals genome-wide significance at 15q13 for nonsyndromic clefting of both the lip and the palate, and functional analyses implicate *GREM1* as a plausible causative gene. *PLoS Genet.* **12**, e1005914. doi:10.1371/journal.pgen.1005914
- Ludwig, K. U., Böhmer, A. C., Bowes, J., Nikolić, M., Ishorst, N., Wyatt, N., Hammond, N. L., Gözl, L., Thieme, F., Barth, S. et al. (2017). Imputation of orofacial clefting data identifies novel risk loci and sheds light on the genetic background of cleft lip/cleft palate and cleft palate only. *Hum. Mol. Genet.* **26**, 829-842. doi:10.1093/hmg/ddx012
- Mackenzie, A., Leeming, G. L., Jowett, A. K., Ferguson, M. W. and Sharpe, P. T. (1991). The homeobox gene *Hox 7.1* has specific regional and temporal expression patterns during early murine craniofacial embryogenesis, especially tooth development in vivo and in vitro. *Development* **111**, 269-285.
- Mangold, E., Ludwig, K. U., Birnbaum, S., Baluardo, C., Ferrian, M., Herms, S., Reutter, H., de Assis, N. A., Chawa, T. A., Mattheisen, M. et al. (2010). Genome-wide association study identifies two susceptibility loci for nonsyndromic cleft lip with or without cleft palate. *Nat. Genet.* **42**, 24-26. doi:10.1038/ng.506
- Mangold, E., Ludwig, K. U. and Nöthen, M. M. (2011). Breakthroughs in the genetics of orofacial clefting. *Trends Mol. Med.* **17**, 725-733. doi:10.1016/j.molmed.2011.07.007
- Manocha, S., Farokhnia, N., Khosropanah, S., Bertol, J. W., Santiago, J., Jr and Fakhouri, W. D. (2019). Systematic review of hormonal and genetic factors involved in the nonsyndromic disorders of the lower jaw. *Dev. Dyn.* **248**, 162-172. doi:10.1002/dvdy.8
- Medio, M., Yeh, E., Popelut, A., Babajko, S., Berdal, A. and Helms, J. A. (2012). *Wnt/β-catenin* signaling and *Msx1* promote outgrowth of the maxillary prominences. *Front. Physiol.* **3**, 375. doi:10.3389/fphys.2012.00375
- Miller, S. F., Weinberg, S. M., Nidey, N. L., Defay, D. K., Marazita, M. L., Wehby, G. L. and Moreno Uribe, L. M. (2014). Exploratory genotype-phenotype correlations of facial form and asymmetry in unaffected relatives of children with non-syndromic cleft lip and/or palate. *J. Anat.* **224**, 688-709. doi:10.1111/joa.12182
- Millicovsky, G. and Johnston, M. C. (1981a). Maternal hyperoxia greatly reduces the incidence of phenytoin-induced cleft lip and palate in *A/J* mice. *Science* **212**, 671-672. doi:10.1126/science.7221553
- Millicovsky, G. and Johnston, M. C. (1981b). Hyperoxia and hypoxia in pregnancy: simple experimental manipulation alters the incidence of cleft lip and palate in *CL/Fr* mice. *Proc. Natl. Acad. Sci. USA* **78**, 5722-5723. doi:10.1073/pnas.78.9.5722
- Mitchell, L. E., Murray, J. C., O'Brien, S. and Christensen, K. (2001). Evaluation of two putative susceptibility loci for oral clefts in the Danish population. *Am. J. Epidemiol.* **153**, 1007-1015. doi:10.1093/aje/153.10.1007
- Mossey, P. A., Little, J., Munger, R. G., Dixon, M. J. and Shaw, W. C. (2009). Cleft lip and palate. *Lancet* **374**, 1773-1785. doi:10.1016/S0140-6736(09)60695-4
- Nagaoka, R., Okuhara, S., Sato, Y., Amagasa, T. and Iseki, S. (2012). Effects of embryonic hypoxia on lip formation. *Birth. Defects Res. A Clin. Mol. Teratol.* **94**, 215-222. doi:10.1002/bdra.23000
- Nakatomi, M., Wang, X.-P., Key, D., Lund, J. J., Turbe-Doan, A., Kist, R., Aw, A., Chen, Y., Maas, R. L. and Peters, H. (2010). Genetic interactions between *Pax9* and *Msx1* regulate lip development and several stages of tooth morphogenesis. *Dev. Biol.* **340**, 438-449. doi:10.1016/j.ydbio.2010.01.031
- Neubüser, A., Koseki, H. and Balling, R. (1995). Characterization and developmental expression of *Pax9*, a paired-box-containing gene related to *Pax1*. *Dev. Biol.* **170**, 701-716. doi:10.1006/dbio.1995.1248
- Neubüser, A., Peters, H., Balling, R. and Martin, G. R. (1997). Antagonistic interactions between FGF and BMP signaling pathways: a mechanism for positioning the sites of tooth formation. *Cell* **90**, 247-255. doi:10.1016/S0092-8674(00)80333-5
- Ogawa, T., Kapadia, H., Feng, J. Q., Raghov, R., Peters, H. and D'Souza, R. N. (2006). Functional consequences of interactions between *Pax9* and *Msx1* genes in normal and abnormal tooth development. *J. Biol. Chem.* **281**, 18363-18369. doi:10.1074/jbc.M601543200
- Otero, L., Gutiérrez, S., Chaves, M., Vargas, C. and Bermudez, L. (2007). Association of *MSX1* with nonsyndromic cleft lip and palate in a Colombian population. *Cleft Palate Craniofac. J.* **44**, 653-656. doi:10.1597/06-097.1
- Parada, C. and Chai, Y. (2012). Roles of BMP signaling pathway in lip and palate development. *Front. Oral Biol.* **16**, 60-70. doi:10.1159/000337617
- Paternoster, L., Zhurov, A. I., Toma, A. M., Kemp, J. P., St Pourcain, B., Timpson, N. J., McMahon, G., McArdle, W., Ring, S. M., Smith, G. D. et al. (2012). Genome-wide association study of three-dimensional facial morphology identifies a variant in *PAX3* associated with nasion position. *Am. J. Hum. Genet.* **90**, 478-485. doi:10.1016/j.ajhg.2011.12.021
- Peters, H., Neubüser, A., Kratochwil, K. and Balling, R. (1998). *Pax9*-deficient mice lack pharyngeal pouch derivatives and teeth and exhibit craniofacial and limb abnormalities. *Genes Dev.* **12**, 2735-2747. doi:10.1101/gad.12.17.2735
- Pickrell, J. K., Berisa, T., Liu, J. Z., Séguere, L., Tung, J. Y. and Hinds, D. A. (2016). Detection and interpretation of shared genetic influences on 42 human traits. *Nat. Genet.* **48**, 709-717. doi:10.1038/ng.3570
- Rafiqdoost, H., Poudineh, A., Bahari, G., Ghaffari, H. and Hashemi, M. (2019). Association of genetic polymorphisms of *GREM1* gene with susceptibility to nonsyndromic cleft lip with or without cleft palate in an Iranian population. *Fetal Pediatr. Pathol.* **25**, 1-13. doi:10.1080/15513815.2019.1666329
- Reynolds, K., Kumari, P., Sepulveda Rincon, L., Gu, R., Ji, Y., Kumar, S. and Zhou, C. J. (2019). Wnt signaling in orofacial clefts: crosstalk, pathogenesis and models. *Dis. Model. Mech.* **12**, dmm037051. doi:10.1242/dmm.037051
- Romitti, P. A., Lidral, A. C., Munger, R. G., Daack-Hirsch, S., Burns, T. L. and Murray, J. C. (1999). Candidate genes for nonsyndromic cleft lip and palate and maternal cigarette smoking and alcohol consumption: evaluation of genotype-environment interactions from a population-based case-control study of orofacial clefts. *Teratology* **59**, 39-50. doi:10.1002/(SICI)1096-9926(199901)59:1<39::AID-TERA9>3.0.CO;2-7
- Satokata, I. and Maas, R. (1994). *Msx1* deficient mice exhibit cleft palate and abnormalities of craniofacial and tooth development. *Nat. Genet.* **6**, 348-356. doi:10.1038/ng0494-348
- Satokata, I., Ma, L., Ohshima, H., Bei, M., Woo, I., Nishizawa, K., Maeda, T., Takano, Y., Uchiyama, M., Heaney, S. et al. (2000). *Msx2* deficiency in mice causes pleiotropic defects in bone growth and ectodermal organ formation. *Nat. Genet.* **24**, 391-395. doi:10.1038/74231
- Schultz, R. E., Cooper, M. E., Daack-Hirsch, S., Shi, M., Nepomucena, B., Graf, K. A., O'Brien, E. K., O'Brien, S. E., Marazita, M. L. and Murray, J. C. (2004). Targeted scan of fifteen regions for nonsyndromic cleft lip and palate in Filipino families. *Am. J. Med. Genet A* **125A**, 17-22. doi:10.1002/ajmg.a.20424
- Senders, C. W., Hendrickx, E. C. and Cukierski, M. A. (2003). Development of the upper lip. *Arch. Facial Plast. Surg.* **5**, 16-25. doi:10.1001/archfaci.5.1.16
- Setó-Salvia, N. and Stanier, P. (2014). Genetics of cleft lip and/or cleft palate: association with other common anomalies. *Eur. J. Med. Genet.* **57**, 381-393. doi:10.1016/j.ejmg.2014.04.003
- Shaffer, J. R., Orlova, E., Lee, M. K., Leslie, E. J., Raffensperger, Z. D., Heike, C. L., Cunningham, M. L., Hecht, J. T., Kau, C. H., Nidey, N. L. et al. (2016). Genome-wide association study reveals multiple loci influencing normal human facial morphology. *PLoS Genet.* **12**, e1006149. doi:10.1371/journal.pgen.1006149
- Slavotinek, A. M., Chao, R., Vacik, T., Yahyavi, M., Abouzeid, H., Bardakjian, T., Schneider, A., Shaw, G., Sherr, E. H., Lemke, G. et al. (2012). *VAX1* mutation associated with microphthalmia, corpus callosum agenesis, and orofacial clefting: the first description of a *VAX1* phenotype in humans. *Hum. Mutat.* **33**, 364-368. doi:10.1002/humu.21658
- Smith, F., Hu, D., Young, N. M., Lainoff, A. J., Jamniczky, H. A., Maltepe, E., Hallgrímsson, B. and Marcucio, R. S. (2013). The effect of hypoxia on facial shape variation and disease phenotypes in chicken embryos. *Dis. Model. Mech.* **6**, 915-924. doi:10.1242/dmm.011064
- Sun, Y., Huang, Y., Yin, A., Pan, Y., Wang, Y., Wang, C., Du, Y., Wang, M., Lan, F., Hu, Z. et al. (2015). Genome-wide association study identifies a new susceptibility locus for cleft lip with or without a cleft palate. *Nat. Commun.* **6**, 6414. doi:10.1038/ncomms7414
- Suzuki, Y., Jezewski, P. A., Machida, J., Watanabe, Y., Shi, M., Cooper, M. E., Viet, L. T., Tin, N. T. D., Hai, H., Natsume, N. et al. (2004). In a Vietnamese population, *MSX1* variants contribute to cleft lip and palate. *Genet. Med.* **6**, 117-125. doi:10.1097/01.GIM.0000127275.52925.05
- Suzuki, S., Marazita, M. L., Cooper, M. E., Miwa, N., Hing, A., Jugessur, A., Natsume, N., Shimoza, K., Ohbayashi, N., Suzuki, Y. et al. (2009). Mutations in *BMP4* are associated with subepithelial, microform, and overt cleft lip. *Am. J. Hum. Genet.* **84**, 406-411. doi:10.1016/j.ajhg.2009.02.002
- Suzuki, A., Sangani, D. R., Ansari, A. and Iwata, J. (2016). Molecular mechanisms of midfacial developmental defects. *Dev. Dyn.* **245**, 276-293. doi:10.1002/dvdy.24368
- Tamargo, J., Caballero, R., Gómez, R., Valenzuela, C. and Delpón, E. (2004). Pharmacology of cardiac potassium channels. *Cardiovasc. Res.* **62**, 9-33. doi:10.1016/j.cardiores.2003.12.026
- Tolarová, M. M. and Cervenka, J. (1998). Classification and birth prevalence of orofacial clefts. *Am. J. Med. Genet.* **75**, 126-137. doi:10.1002/(SICI)1096-8628(19980113)75:2<126::AID-AJMG2>3.0.CO;2-R
- Tongkobetch, S., Sirivan, P. and Shotlersuk, V. (2006). *MSX1* mutations contribute to nonsyndromic cleft lip in a Thai population. *J. Hum. Genet.* **51**, 671-676. doi:10.1007/s10038-006-0006-4
- Trainor, P. A. (2005). Specification of neural crest cell formation and migration in mouse embryos. *Semin. Cell. Dev. Biol.* **16**, 683-693. doi:10.1016/j.semcdb.2005.06.007
- Tuominen, V. J., Ruotoistenmäki, S., Viitanen, A., Jumppanen, M. and Isola, J. (2010). ImmunoRatio: a publicly available web application for quantitative image analysis of estrogen receptor (ER), progesterone receptor (PR), and Ki-67. *Breast Cancer Res.* **12**, R56. doi:10.1186/bcr2615



- van den Boogaard, M.-J., Dorland, M., Beemer, F. A. and van Amstel, H. K. P.** (2000). *MSX1* mutation is associated with orofacial clefting and tooth agenesis in humans. *Nat. Genet.* **24**, 342-343. doi:10.1038/74155
- van den Boogaard, M.-J. H., de Costa, D., Krapels, I. P. C., Liu, F., van Duijn, C., Sinke, R. J., Lindhout, D. and Steegers-Theunissen, R. P. M.** (2008). The *MSX1* allele 4 homozygous child exposed to smoking at periconception is most sensitive in developing nonsyndromic orofacial clefts. *Hum. Genet.* **124**, 525-534. doi:10.1007/s00439-008-0569-6
- Vastardis, H., Karimbux, N., Guthua, S. W., Seidman, J. G. and Seidman, C. E.** (1996). A human *MSX1* homeodomain missense mutation causes selective tooth agenesis. *Nat. Genet.* **13**, 417-421. doi:10.1038/ng0896-417
- Vieira, A. R., Avila, J. R., Daack-Hirsch, S., Dragan, E., Félix, T. M., Rahimov, F., Harrington, J., Schultz, R. R., Watanabe, Y., Johnson, M. et al.** (2005). Medical sequencing of candidate genes for nonsyndromic cleft lip and palate. *PLoS Genet.* **1**, e64. doi:10.1371/journal.pgen.0010064
- Wang, X., Song, H., Jiao, X., Hao, Y., Zhang, W., Gao, Y., Li, Y., Mi, N. and Yan, J.** (2018). Association between a single-nucleotide polymorphism in the *GREM1* gene and non-syndromic orofacial cleft in the Chinese population. *J. Oral Pathol. Med.* **47**, 206-210. doi:10.1111/jop.12662
- Webster, W. S. and Abela, D.** (2007). The effect of hypoxia in development. *Birth Defects Res. C Embryo. Today* **81**, 215-228. doi:10.1002/bdrc.20102
- Webster, W. S., Howe, A. M., Abela, D. and Oakes, D. J.** (2006). The relationship between cleft lip, maxillary hypoplasia, hypoxia and phenytoin. *Curr. Pharm. Des.* **12**, 1431-1448. doi:10.2174/138161206776389868
- Wilson-Nagrani, C., Richmond, S. and Paternoster, L.** (2018). Non-syndromic cleft lip and palate polymorphisms affect normal lip morphology. *Front. Genet.* **9**, 413. doi:10.3389/fgene.2018.00413
- Xiong, Z., Dankova, G., Howe, L. J., Lee, M. K., Hysi, P. G., de Jong, M. A., Zhu, G., Adhikari, K., Li, D., Li, Y. et al.** (2019). Novel genetic loci affecting facial shape variation in humans. *eLife* **8**, e49898. doi:10.7554/eLife.49898
- Yu, Y., Zuo, X., He, M., Gao, J., Fu, Y., Qin, C., Meng, L., Wang, W., Song, Y., Cheng, Y. et al.** (2017). Genome-wide analyses of non-syndromic cleft lip with palate identify 14 novel loci and genetic heterogeneity. *Nat. Commun.* **8**, 14364. doi:10.1038/ncomms14364
- Zhang, Z., Song, Y., Zhao, X., Zhang, X., Fermin, C. and Chen, Y.** (2002). Rescue of cleft palate in *Msx1*-deficient mice by transgenic *Bmp4* reveals a network of BMP and Shh signaling in the regulation of mammalian palatogenesis. *Development* **129**, 4135-4146.
- Zhou, J., Gao, Y., Lan, Y., Jia, S. and Jiang, R.** (2013). *Pax9* regulates a molecular network involving *Bmp4*, *Fgf10*, *Shh* signaling and the *Osr2* transcription factor to control palate morphogenesis. *Development* **140**, 4709-4718. doi:10.1242/dev.099028
